# Supplementary material
Source: ML conference proceedings conference paper supplement (https://openreview.net/forum?id=fR1rCXjCQX)
Supplement: supplementary_material [file attachment]

# Learning Compositional Behaviors from Demonstration and Language

Anonymous Author(s)

Affiliation

Address

email

**Abstract:** We introduce Behavior from Language and Demonstration (BLADE), a framework for long-horizon robotic manipulation by integrating imitation learning and model-based planning. BLADE leverages language-annotated demonstrations, extracts abstract action knowledge from large language models (LLMs), and constructs a library of structured, high-level action representations. These representations include preconditions and effects grounded in visual perception for each high-level action, along with corresponding controllers implemented as neural network-based policies. BLADE can recover such structured representations automatically, without manually labeled states or symbolic definitions. BLADE shows significant capabilities in generalizing to novel situations, including novel initial states, external state perturbations, and novel goals. We validate the effectiveness of our approach both in simulation and on a real robot with a diverse set of objects with articulated parts, partial observability, and geometric constraints.

**Keywords:** Manipulation, Planning Abstractions, Learning from Language

## 1 Introduction

Developing autonomous robots capable of completing long-horizon manipulation tasks that involve interacting with many objects is a significant milestone. We want to build robots that can directly perceive the world, operate over extended periods, generalize to various states and goals, and are robust to perturbations. A promising direction is to combine learned policies with model-based planners, allowing them to operate on different time scales. In particular, imitation learning-based methods have proven highly successful in learning policies for various “behaviors,” which usually operate over a short time span [e.g., 1]. To solve more complex and longer-horizon tasks, we can compose these behaviors by planning in explicit abstract action spaces [2–4], in latent spaces [5], or via large pre-trained models such as large language models [6].

However, one of the key challenges of all high-level planning approaches is the automatic acquisition of an abstraction for the learned “behaviors” to support long-horizon planning. The goal of this behavior abstraction learning is to build representations that describe the preconditions and effects of behaviors, to enable chaining and search. These representations should depend on the environment, the set of possible goals, and the specifications of individual behaviors. Furthermore, these representations should be grounded on high-dimensional perception inputs and low-level robot control commands.

Our insight into tackling this challenge is to leverage knowledge from two sources: the low-level, mechanical understanding of robot-object contact, and the high-level, abstract understanding of object-object interactions described in language that can be extracted from language models as the knowledge source. We bridge them by learning the grounding of abstract language terms on visual perception and robot actuation. Our framework, behavior from language and demonstration (BLADE), takes as input a small number of language-annotated demonstrations (Fig. 1a). It segments each trajectory based on which object is in contact with the robot. Then, it uses a large language model (LLM), conditioned on the contact sequences and the language annotations, to propose abstract behavior descriptions with preconditions and effects that best explain the demonstration trajectories.

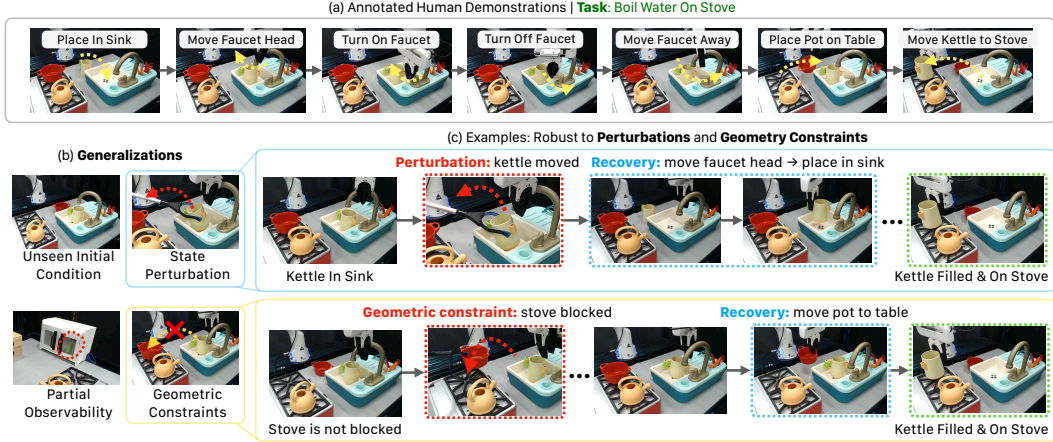

**Figure 1: BLADE**, a robot manipulation framework combining imitation learning and model-based planning. (a) BLADE takes language-annotated demonstrations as training data. (b) It generalizes to unseen initial conditions, state perturbations, and geometric constraints. (c) In the depicted scenarios, BLADE recovers from perturbations such as moving the kettle out of the sink, and resolves geometric constraints including a blocked stove.

During training, we extract the state abstraction terms from the preconditions and effects (e.g., *turned-on*, *aligned-with*), and learn their groundings on perception inputs. We also learn the control policies associated with each behavior (e.g., *turn on the faucet*).

Our model offers several advantages. First, unlike prior work that relies on manually defined state abstractions or additional state labels, our method automatically generates state abstraction labels based on the language annotations and LLM-proposed behavior descriptions. BLADE recovers the visual grounding of these abstractions without any additional label. Second, BLADE generalizes to novel states and goals by composing learned behaviors using a planner. Shown in Fig. 1b, it can handle various novel initial conditions and external perturbations that lead to unseen states. Third, our method can handle novel geometric constraints (Fig. 1c), novel goals expressed in learned state abstractions, and partial observability from articulated bodies like drawers.

## 2 Related Work

**Composing skills for long-horizon manipulation.** A large body of model-based planning methods use manually-defined transition models [2, 7–9] or models learned from data [10–15] to generate long-horizon plans. However, learning dynamics models with accurate long-term predictions and strong generalization remains challenging. Another related direction is to introduce hierarchical structures into the policy models [16–20], where different methods have been introduced to decompose continuous demonstrations into segments for short-horizon skills [20–22]. Unable to model the dependencies between the skills, these methods are limited to following sequentially specified subgoals and struggle to generalize to unseen goals. Researchers have also used learned models to improve state estimation [23] and planning efficiency [24]. However, they still require manual definitions of planning knowledge. Some work addresses this issue by learning the dependencies between actions from data, but they still require large-scale supervised datasets [25–27]. In contrast, BLADE learns planning-compatible action representations from only language-annotated demonstrations.

**Using LLMs for planning.** Many researchers have explored using LLMs for planning. Methods for direct generation of action sequences [28, 29] usually do not produce accurate plans [30, 31]. Researchers have also leveraged LLMs as translators from natural language instructions to symbolic goals [32–35], as generalized solvers [36], as memory modules [37], and as world models [38, 39]. To improve the planning accuracy of LLMs, prior work has explored techniques including learning affordance functions [6, 40], replanning [41], finetuning [42–44], and VLM-based decision-making [45, 46]. BLADE shares a similar spirit as methods using LLMs to generate planning-compatible action representations [47–49]. However, they all make assumptions on the availability of state abstractions, while BLADE automatically grounds LLM-generated action definitions without additional labels.



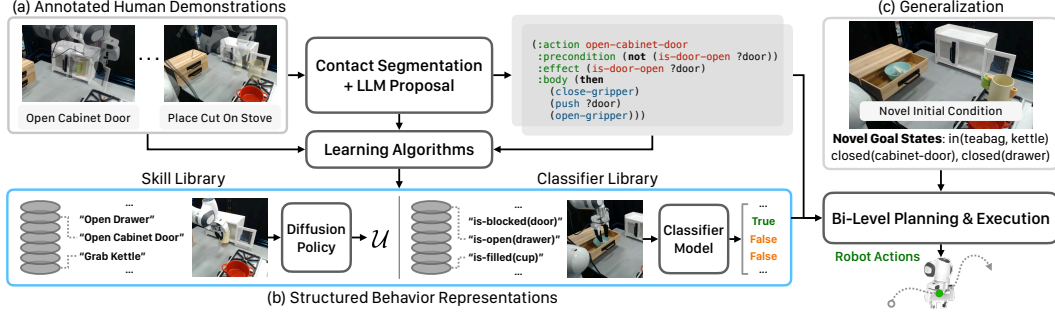

**Figure 2: Overview of BLADE.** (a) It receives language-annotated human demonstrations, (b) segments demonstrations into contact primitives, and learns a structured behavior representation. (c) It generalizes to novel initial conditions, leveraging bi-level planning and execution to achieve goal states.

### 3 Problem Formulation

We consider the problem of learning a language-conditioned goal-reaching manipulation policy. Formally, the environment is modeled as a tuple  $\langle \mathcal{X}, \mathcal{U}, \mathcal{T} \rangle$  where  $\mathcal{X}$  is the raw state space,  $\mathcal{U}$  is the low-level action space, and  $\mathcal{T} : \mathcal{X} \times \mathcal{U} \rightarrow \mathcal{X}$  is the transition function (which may be stochastic and unknown). Furthermore, the robot will receive observations  $o \in \mathcal{O}$  that may be partially observable views of the states. At test time, the robot also receives a natural language instruction  $\ell_t$ , which corresponds to a set of goal states. An oracle goal satisfaction function defines whether the language goal is reached, i.e.,  $g_{\ell_t} : \mathcal{X} \rightarrow \{T, F\}$ . Given an initial state  $x_0 \in \mathcal{X}$  and the instruction  $\ell_t$ , the robot should generate a sequence of low-level actions  $\{u_1, u_2, \dots, u_H\} \in \mathcal{U}^H$ .

In the language-annotated learning setting, the robot has a dataset of language-annotated demonstrations  $\mathcal{D}$ . Each demonstration is a sequence of robot actions  $\{u_1, \dots, u_H\}$  paired with observations  $\{o_0, \dots, o_H\}$ . Each trajectory is segmented into  $M$  subtrajectories, and natural language descriptions  $\{\ell_1, \dots, \ell_M\}$  are associated with the segments (e.g., “place the kettle on the stove”). In this paper, we assume that there is a finite number of possible  $\ell$ ’s—each corresponding to a skill to learn.

Directly learning a single goal-conditioned policy that can generalize to novel states and goals is challenging. Therefore, we recover an *abstract* state and action representation of the environment and combine online planning in abstract states and offline policy learning for low-level control to solve the task. In BLADE, behaviors are represented as temporally extended actions with preconditions and effects characterized by state predicates. Formally, we want to recover a set of predicates  $\mathcal{P}$  that define an abstract state space  $\mathcal{S}$ . We focus on a scenario where all predicates are binary. However, they are grounded on high-dimensional sensory inputs. Using  $\mathcal{P}$ , a state can be described as a set of grounded atoms such as  $\{kettle(A), stove(B), filled(A), on(A, B)\}$  for a two-object scene. BLADE will learn a function  $\Phi : \mathcal{O} \rightarrow \mathcal{S}$  that maps observations to abstract states. In its current implementation, BLADE requires humans to additionally provide a list of predicate names in natural language, which we have found to be helpful for LLMs to generate action definitions. We provide additional ablations in the Appendix A.2. Based on  $\mathcal{S}$ , we learn a library of *behaviors* (a.k.a., *abstract actions*). Each behavior  $a \in \mathcal{A}$  is a tuple of  $\langle name, args, pre, eff, \pi \rangle$ . *name* is the name of the action. *args* is a list of variables related to the action, often denoted by  $?x, ?y$ . *pre* and *eff* are the precondition and effect formula defined in terms of the variables *args* and the predicates  $\mathcal{P}$ . A low-level policy  $\pi : \mathcal{O} \rightarrow \mathcal{U}$  is also associated with *a*. The semantics of the preconditions and effects is: for any state  $x$  such that  $pre(\Phi(x))$  is satisfied, executing  $\pi$  at  $x$  will lead to a state  $x'$  such that  $eff(\Phi(x'))$  [50].

### 4 Behavior from Language and Demonstration

BLADE is a method for learning abstract state and action representations from language-annotated demonstrations. It works in three steps, as illustrated in Fig. 2. First, we generate a symbolic behavior definition conditioned on the language annotations and contact sequences in the demonstration using a large language model (LLM). Next, we learn the classifiers associated with all state predicates and the control policies, all from the demonstration without additional annotations. At test time, we use a bi-level planning and execution strategy to generate robot actions.

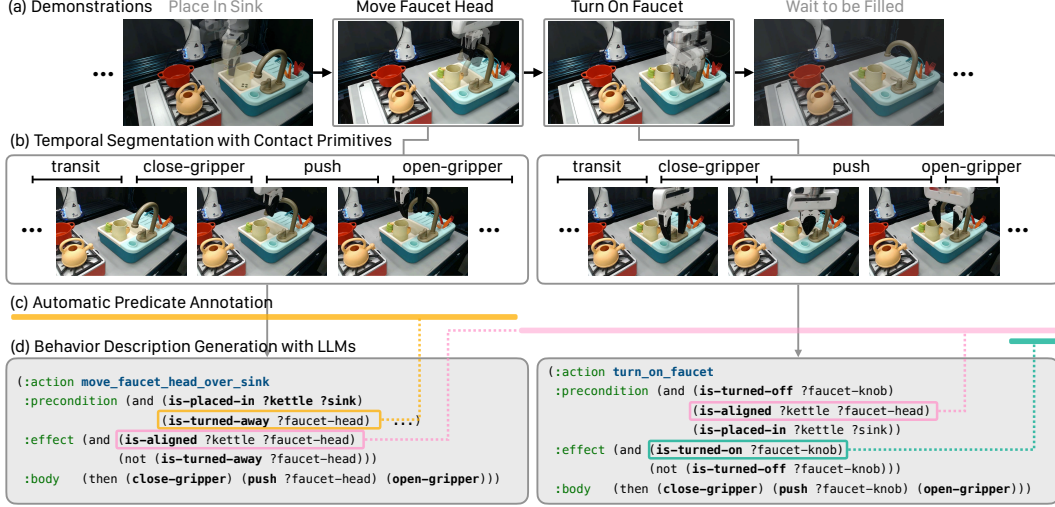

**Figure 3: Behavior Descriptions Learning.** Starting with (a) human demonstrations with language annotations, BLADE segments (b) the demonstrations into contact primitives such as “close-gripper,” and “push.” Then, BLADE (d) generates operators using an LLM, defining actions with specific preconditions and effects. (c) These operators allow for automatic predicate annotation based on the preconditions and effects.

#### 4.1 Behavior Description Learning

Given a finite set of behaviors with language descriptions  $\{\ell\}$  and corresponding demonstration segments, we generate an abstract description for each  $\ell$  by querying large language models. To facilitate LLM generation, we provide additional information on the list of objects with which the robot has contact. The generated operators are further refined with abstract verification.

**Temporal segmentation.** We first segment each demonstration (Fig. 3a) into a sequence of *contact-based primitives* (Fig. 3b). In this paper we consider seven primitives describing the interactions between the robot and other objects: *open/close grippers* without holding objects, *move-to( $x$ )* which moves the gripper to an object, *grasp( $x, y$ )* and *place( $x, y$ )* which grasp and place object  $x$  from/onto another object  $y$ , *move( $x$ )* which moves the currently holding object  $x$  and *push( $x$ )*. We leverage proprioception, i.e., gripper open state, and object segmentation to automatically segment the continuous trajectories into these basis segments. For example, pushing the faucet head away involves the sequence of  $\{\text{close-gripper}, \text{push}, \text{open-gripper}\}$ . This segmentation will be used for LLMs to generate operator definitions and for constructing training data for control policies.

**Behavior description generation with LLMs.** Our behavior description language is based on PDDL [51]. We extend the PDDL definition to include a *body* section which is a sequence of contact primitives. It will be generated by the LLM based on the demonstration data.

Our input to the LLM contains four parts: 1) a general description of the environment, 2) the natural language descriptions  $\ell$  associated with the behavior itself and other behaviors that have appeared preceding  $\ell$  in the dataset, 3) all possible sequence of contact primitive sequences associated with  $\ell$  across the dataset, and 4) additional instructions on the PDDL syntax, including a single PDDL definition example. We find that the inclusion of previous behaviors and contact primitive sequences improves the overall generation quality. As shown in Fig. 3c, in addition to preconditions and effects of the operators, we also ask LLMs to predict a *body* of contact primitive sequence associated with the behavior, which we call *body*. We assume that each behavior has a single corresponding contact primitive sequence, and use this step to account for noises in the segmentation annotations. After LLM predicts the definition for all behavior, we will re-segment the demonstrations associated with each behavior based on the LLM-predicted body section.

**Behavior description refinement with abstract verification.** Besides checking for syntax errors, we also verify the generated behavior descriptions by performing *abstract verification* on the demonstration trajectories. In particular, given a segmented sequence of the trajectory where each segment is associated with a behavior, we verify whether the preconditions of each behavior can be satisfied

by the accumulated effects of the previous behaviors. This verification does not require learning the grounding of state predicates and can be done at the behavior level to discover incorrect preconditions and effects, and at the contact primitive level to find missing or incorrect contact primitives (e.g., *grasp* cannot be immediately followed by other *grasp*). We resample behavior definitions that do not pass the verification test.

## 4.2 Classifier and Policy Learning

Given the dataset of state-action segments associated with each behavior, we train the classifiers for different state predicates and the low-level controller for each behavior.

**Automatic predicate annotation.** We leverage *all* behavior descriptions to automatically label an observation  $\bar{o} = \{o_1, \dots, o_H\}$  based on its associated segmentation. In particular, at  $o_0$ , we label all state predicates as “unknown.” Next, we unroll the sequence of behavior executed in  $\bar{o}$ . As illustrated in Fig. 3c, before applying a behavior  $a$  at step  $o_t$ , we label all predicates in  $pre_a$  true. When  $a$  finishes at step  $o_{t'}$ , we label all predicates in  $eff_a$ . In addition, we will propagate the labels for state predicates to later time steps until they are explicitly altered by another behavior  $a$ . In contrast to earlier methods, such as Migimatsu and Bohg [52] and Mao et al. [53], which directly use the first and last state of state-action segments to train predicate classifiers, our method greatly increases the diversity of training data. After this step, for each predicate  $p \in \mathcal{P}$ , we obtain a dataset of paired observations  $o$  and the predicate value of  $p$  at the corresponding time step.

**Classifier learning.** Based on the state predicate dataset generated from behavior definitions, we train a set of state classifiers  $f_\theta(p) : \mathcal{O} \rightarrow \{T, F\}$ , which are implemented as standard neural networks for classification. We include implementation details in Appendix A.6. In real-world environments with strong data-efficiency requirements, we additionally use an open vocabulary object detector [54] to detect relevant objects for the state predicate and crop the observation images. For example, only pixels associated with the object faucet will be the input to the *turned-on*(faucet) classifier.

**Policy learning.** For each behavior, we also train control policies  $\pi_\theta(a) : \mathcal{O} \rightarrow \mathcal{U}$ , implemented as a diffusion policy [1]. In simulation, we use a combination of frame-mounted and wrist-mounted RGB-D cameras as the inputs to the diffusion policy, while in the real world, the policy takes raw camera images as input. The high-level planner orchestrates which of these low-level policies to deploy based on the scene and states. Once trained on these diverse demonstrations of different skills, the resulting low-level policies can adapt to local changes, such as variations in object poses.

## 4.3 Bi-Level Planning and Execution

At test time, given a novel state and a novel goal, BLADE first uses LLMs to translate the goal into a first-order logic formula based on the state predicates. Next, it leverages the learned state abstractions to perform planning in a symbolic space to produce a sequence of behaviors. Then, we execute the low-level policy associated with the first behavior, and we re-run the planner after the low-level policy finishes—this enables us to handle various types of uncertainties and perturbations, including execution failure, partial observability, and human perturbation.

Visibility and geometric constraints are also modeled as preconditions, in addition to other object-state and relational conditions. For example, the behavior “opening the cabinet door” will have preconditions on the initial state of the door, a visibility constraint that the door is visible, and a geometric constraint that nothing is blocking the door. When those preconditions are not satisfied, the planner will automatically generate plans, such as actions that move obstacles away, to achieve them. Partial observability was handled by using the most-likely state assumption during planning and performing replanning. We include details in Appendix A.8.

# 5 Experiments

## 5.1 Simulation Experimental Setup

We use the CALVIN benchmark [55] for simulation-based evaluations, which include teleoperated human-play data. We use the split  $D$  of the dataset, which consists of approximately 6 hours of interactions. Annotations of the play data are generated by a script that detects goal conditions on

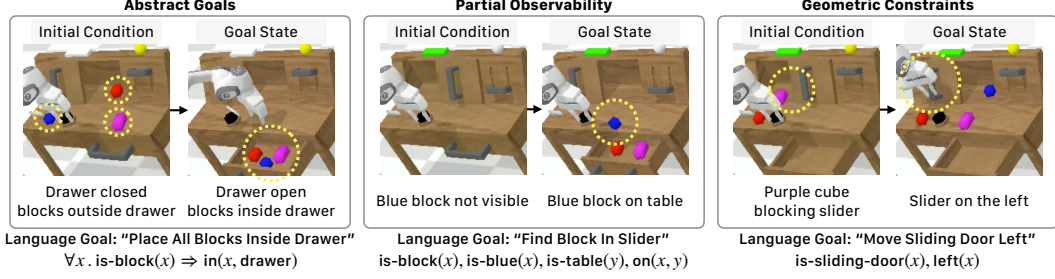

**Figure 4: Generalization Tasks in CALVIN.** Examples from the three generalization tasks in the CALVIN simulation environment. Successfully completing these tasks require planning for and executing 3-7 actions.

**Table 1: Generalization results in CALVIN.** Mean success rates with STD from three seeds are reported. BLADE outperforms latent planning, LLM, and VLM baselines in completing novel long-horizon tasks.

| Method            | State Classifier | Latent Feasibility | Generalization Task                 |                                     |                                    |
|-------------------|------------------|--------------------|-------------------------------------|-------------------------------------|------------------------------------|
|                   |                  |                    | Abstract Goal                       | Geometric Constraint                | Partial Observability              |
| HULC [56]         | N/A              | N/A                | $2.78 \pm 3.47$                     | $11.67 \pm 11.55$                   | $0.00 \pm 0.00$                    |
| SayCan [6]        | N/A              | Short              | $0.00 \pm 0.00$                     | $0.00 \pm 0.00$                     | $0.00 \pm 0.00$                    |
| VILA [45]         | N/A              | N/A                | $18.38 \pm 2.48$                    | $0.00 \pm 0.00$                     | $4.17 \pm 5.20$                    |
| T2M-Shooting [40] | Learned          | Long               | $57.78 \pm 12.29$                   | $0.00 \pm 0.00$                     | $13.33 \pm 1.44$                   |
| Ours              | Learned          | N/A                | <b><math>68.33 \pm 10.14</math></b> | <b><math>26.67 \pm 7.64</math></b>  | <b><math>75.83 \pm 3.82</math></b> |
| T2M-Shooting [40] | GT               | Long               | $61.67 \pm 5.00$                    | $0.00 \pm 0.00$                     | $0.83 \pm 1.44$                    |
| Ours              | GT               | N/A                | <b><math>76.11 \pm 6.74</math></b>  | <b><math>56.67 \pm 16.07</math></b> | <b><math>70.00 \pm 5.00</math></b> |

simulator states, and there are in total 34 types of behaviors. We use RGB-D images from the mounted camera for classifier learning and partial 3D point clouds recovered from the RGB-D cameras for policy learning. The original benchmark focuses only on evaluating individual skills. To evaluate the ability of different algorithms to compositionally combine previously learned policies to solve novel tasks, we design six new generalization tasks, as shown in Fig. 4. Each task has a language instruction, a sampler that generates random initial states, and a goal satisfaction function for evaluation. For each task, we sample 20 initial states and evaluate all methods with three different random seeds. See Appendix B.1 for more details on the benchmark setup.

**Baselines.** We compare BLADE with two groups of baselines: hierarchical policies with planning in latent spaces and LLM/VLM-based methods for robotic planning. For the former, we use HULC [56], the state-of-the-art method in CALVIN, which learns a hierarchical policy from language-annotated play data using hindsight labeling. For the latter, we use SayCan [6], Robot-VILA [45], and Text2Motion [40]. Note that Text2Motion assumes access to ground-truth symbolic states. Hence we compare Text2Motion with BLADE in two settings: one with the ground-truth states and the other with the state classifiers learned by BLADE. See Appendix B.2 for more details on these methods.

## 5.2 Results in Simulation

Table 1 presents the performance of different models in all three types of generalization tasks.

**Structured behavior representations improve long-horizon planning.** We first focus on the comparison with the hierarchical policy model HULC in Table. 1. BLADE with learned classifiers achieves a more than 65% improvement in the success rate for reaching abstract goals while using the same language-annotated play data. We attribute this to the particular implementation of hindsight labeling in HULC being not sufficient to achieve goals that require chaining together multiple high-level actions: for example, the task of placing all blocks in the closed drawer requires chaining together a minimum of 7 behaviors.

**Structured transition models learned by BLADE facilitate long-horizon planning.** Both SayCan and T2M-Shooting learn a long-horizon transition and action feasibility model for planning. Shown in Table. 1, learning accurate feasibility models directly from raw demonstration data remains a significant challenge. In our experiment, we find that first, when the LLM does not take into account state information (SayCan), using the short-horizon feasibility model is not sufficient to produce



sound plans. Second, since our model learns a structured transition model, factorized into different state predicates, BLADE is capable of producing longer-horizon plans.

**Structured scene representations facilitate making feasible plans.** Compared to the Robot-VILA method, which directly predicts action sequences based on the image state, BLADE first uses learned state classifiers to construct an abstract state representation. This contributes to a 49% improvement on the Abstract Goal tasks in Table 1. We observe that the pre-trained VLM used in Robot-VILA often predicts actions that are not feasible in the current state. For example, Robot-VILA consistently performs better in completing “placing all blocks in a closed drawer” than “placing all blocks in an open drawer” since it always predicts opening the drawer as the first step.

**Explicit modeling of geometric constraints and object visibility improves performance in these scenarios.** BLADE can reason about these challenging situations without explicitly being trained in those settings. Table. 1 shows that our approach consistently outperforms baselines in these two settings. These generalization capabilities are built on the explicit modeling of geometric constraints and object visibility in behavior preconditions.

**BLADE can automatically propose operators for the specific environment given demonstrations.** Our experiment shows that the LLM can automatically propose high-quality behavior descriptions that resemble the dependency structures among operators. For example, the LLM discovers from the given contact primitive sequences and language-paired demonstration that blocks can only be placed after the block is lifted and that a drawer needs to be opened before placing objects inside, etc. Some of these dependencies are unique to the CALVIN environment, therefore requiring the LLM to generate specifically for this domain. We provide more visualizations in the Appendix A.1.

**BLADE’s automatic predicate annotation enables better classifier learning.** From

Table 1, we observe that having accurate state classifier models is critical for algorithms’ performance (GT vs. Learned). Hence, we perform additional ablation studies on classifier learning. Migimatsu and

**Table 2:** Ablation on state classifier learning in CALVIN.

| Method | Abstract                            | Geometric                          | Partial Obs.                       |
|--------|-------------------------------------|------------------------------------|------------------------------------|
| [52]   | 33.89 $\pm$ 5.85                    | 9.17 $\pm$ 5.20                    | 3.33 $\pm$ 2.89                    |
| BLADE  | <b>68.33 <math>\pm</math> 10.14</b> | <b>26.67 <math>\pm</math> 7.64</b> | <b>75.83 <math>\pm</math> 3.82</b> |

Bohg [52] also presented a method for learning the preconditions and effects of actions from segmented trajectories and symbolic action descriptions. The key difference between BLADE and theirs is that they only use the first and last frame of each segment to supervise the learning of state classifiers. We compare the two classifier learning algorithms, given the same LLM-generated behavior definitions, by evaluating the classifier accuracy on held-out states. BLADE shows a 20.7% improvement in F1 (16.3% improvement for classifying object states and 38.6% improvement for classifying spatial relations) compared to the baseline model. This also translates into significant improvements in the planning success rate, as shown in Table 2,

### 5.3 Real World Experiments

**Environments.** We use a Franka Emika robot arm with a parallel jaw gripper. The setup includes five RealSense RGB-D cameras, with one being wrist-mounted on the robot and the remaining positioned around the workspace. Fig. 5 shows the two domains: Make Tea and Boil Water. For each domain, we collect 85 language-annotated demonstrations using teleoperation with a 3D mouse. After segmenting the demonstrations using proprioception sensor data, an LLM is used to generate behavior descriptions. These descriptions are subsequently used for policy and classifier learning.

**Setup.** We compare BLADE against the VLM-based baseline Robot-VILA. We omit SayCan and T2M-Shooting since they require additional training data. We first test the original action sequences seen in the demonstrations for each domain. We then test on tasks that require novel compositions of behaviors for four types of generalizations, i.e., unseen initial condition, state perturbation, geometric constraints, and partial observability. For each generalization type, we run six experiments and report the number of experiments that have been successfully completed.

**Results.** In Fig. 5, we show that our model is able to successfully complete at least 4/6 tasks for all generalization types in the two different domains. In comparison, Robot-VILA struggles to generate

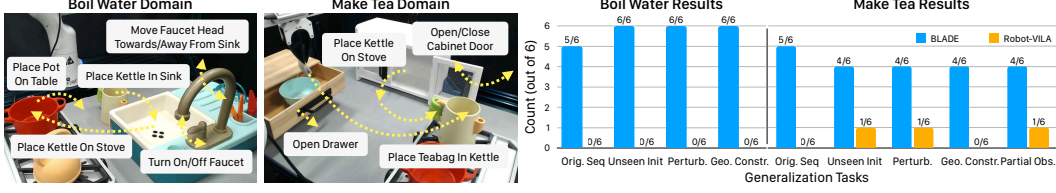

**Figure 5: Domains and Results in Real World.** **Make Tea** features a toy kitchen designed to simulate boiling water on a stove. The robot must assess the available space on the stove for the kettle. It also needs to manage the dependencies between actions, such as the faucet must be turned away before the kettle can be placed into the sink to avoid collisions. **Boil Water** involves a tabletop task aimed at preparing tea, incorporating a cabinet, a drawer, and a stove. The robot must locate the kettle, potentially hidden within the cabinet, and a teabag in the drawer. Additionally, it must consider geometric constraints by removing obstacles that block the cabinet doors. In both environments, our model significantly outperforms the VLM-based planner Robot-VILA.

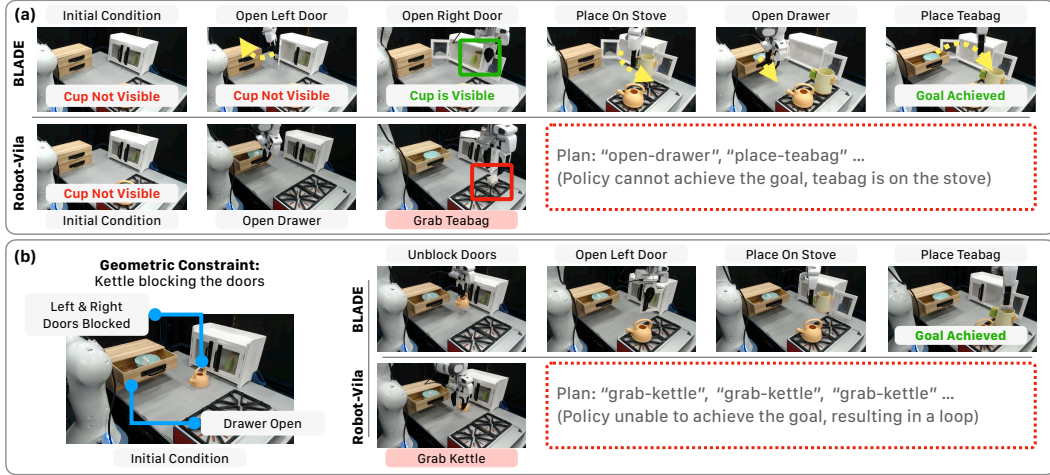

**Figure 6: Real World Planning and Execution.** We show the execution traces from BLADE and Robot-VILA for two generalization tasks: (a) partial observability and (b) geometric constraints.

correct plans to complete the tasks. In Fig. 6, we visualize the generated plans and execution traces of both models. In example A, we show that BLADE can find the kettle initially hidden in the cabinet and then complete the rest of the task. In comparison, Robot-VILA directly predicts placing the teabag in the kettle when the kettle is not visible, resulting in a failure.

## 6 Conclusion and Discussion

BLADE is a novel framework for long-horizon manipulation by integrating model-based planning and imitation learning. BLADE uses an LLM to generate behavior descriptions with preconditions and effects from language-annotated demonstrations and automatically generates state abstraction labels based on behavior descriptions for learning state classifiers. At performance time, BLADE generalizes to novel states and goals by composing learned behaviors with a planner. Compared to latent-space and LLM/VLM-based planners, BLADE successfully completes significantly more long-horizon tasks with various types of generalizations.

**Limitations.** One limitation of BLADE is that the automatic segmentation of demonstrations is based on gripper states; more advanced contact detection techniques might be required for certain tasks such as caging grasps. We also assume the knowledge of a given set of predicate names in natural language and focus on learning dependencies between actions using the given predicates. Automatically inventing task-specific predicates from demonstrations and language annotations, possibly with the integration of vision-language models (VLMs) is an important future direction. In our experiments, we also found that noisy state classification led to some planning failures. Therefore, developing planners that are more robust to noises in state estimation is necessary. Finally, achieving novel compositions of behaviors also requires policies with strong generalization to novel environmental states, which remain a challenge for skills learned from a limited amount of demonstration data.

## References

- [1] C. Chi, S. Feng, Y. Du, Z. Xu, E. Cousineau, B. Burchfiel, and S. Song. Diffusion policy: Visuomotor policy learning via action diffusion. In *RSS*, 2023. 1, 5, 17
- [2] C. R. Garrett, T. Lozano-Pérez, and L. P. Kaelbling. PDDLStream: Integrating Symbolic Planners and Blackbox Samplers via Optimistic Adaptive Planning. In *ICAPS*, 2020. 1, 2
- [3] D. Xu, A. Mandlekar, R. Martín-Martín, Y. Zhu, S. Savarese, and L. Fei-Fei. Deep affordance foresight: Planning through what can be done in the future. In *ICRA*, 2021.
- [4] H. Shi, H. Xu, Z. Huang, Y. Li, and J. Wu. RoboCraft: Learning to see, simulate, and shape elasto-plastic objects in 3d with graph networks. *IJRR*, 43(4):533–549, 2024. 1
- [5] C. Lynch, M. Khansari, T. Xiao, V. Kumar, J. Tompson, S. Levine, and P. Sermanet. Learning latent plans from play. In *CoRL*, 2020. 1
- [6] A. Brohan, Y. Chebotar, C. Finn, K. Hausman, A. Herzog, D. Ho, J. Ibarz, A. Irpan, E. Jang, R. Julian, et al. Do as I can, not as I say: Grounding language in robotic affordances. In *CoRL*, 2023. 1, 2, 6
- [7] S. Srivastava, E. Fang, L. Riano, R. Chitnis, S. Russell, and P. Abbeel. Combined Task and Motion Planning through an Extensible Planner-Independent Interface Layer. In *ICRA*, 2014. 2
- [8] N. T. Dantam, Z. K. Kingston, S. Chaudhuri, and L. E. Kavraki. Incremental task and motion planning: A constraint-based approach. In *RSS*, 2016.
- [9] M. Toussaint. Logic-Geometric Programming: An optimization-based approach to combined task and motion planning. In *IJCAI*, 2015. 2
- [10] C. Finn and S. Levine. Deep visual foresight for planning robot motion. In *ICRA*, 2017. 2
- [11] S. Nair and C. Finn. Hierarchical foresight: Self-supervised learning of long-horizon tasks via visual subgoal generation. In *ICLR*, 2020.
- [12] H. Shi, H. Xu, S. Clarke, Y. Li, and J. Wu. Robocook: Long-horizon elasto-plastic object manipulation with diverse tools. In *CoRL*, 2023.
- [13] A. Simeonov, Y. Du, B. Kim, F. Hogan, J. Tenenbaum, P. Agrawal, and A. Rodriguez. A long horizon planning framework for manipulating rigid pointcloud objects. In *CoRL*, 2021.
- [14] X. Lin, C. Qi, Y. Zhang, Z. Huang, K. Fragkiadaki, Y. Li, C. Gan, and D. Held. Planning with spatial and temporal abstraction from point clouds for deformable object manipulation. In *CoRL*, 2022.
- [15] Y. Du, M. Yang, P. Florence, F. Xia, A. Wahid, B. Ichter, P. Sermanet, T. Yu, P. Abbeel, J. B. Tenenbaum, et al. Video language planning. *arXiv:2310.10625*, 2023. 2
- [16] J. Luo, C. Xu, X. Geng, G. Feng, K. Fang, L. Tan, S. Schaal, and S. Levine. Multi-stage cable routing through hierarchical imitation learning. *IEEE Transactions on Robotics*, 2024. 2
- [17] L. X. Shi, Z. Hu, T. Z. Zhao, A. Sharma, K. Pertsch, J. Luo, S. Levine, and C. Finn. Yell at your robot: Improving on-the-fly from language corrections. *arXiv:2403.12910*, 2024.
- [18] S. Pirk, K. Hausman, A. Toshev, and M. Khansari. Modeling long-horizon tasks as sequential interaction landscapes. In *CoRL*, 2020.
- [19] C. Wang, L. Fan, J. Sun, R. Zhang, L. Fei-Fei, D. Xu, Y. Zhu, and A. Anandkumar. Mimicplay: Long-horizon imitation learning by watching human play. In *CoRL*, 2023.

- [20] C. Lynch and P. Sermanet. Language conditioned imitation learning over unstructured data. In *RSS*, 2021. 2
- [21] Z. Zhang, Y. Li, O. Bastani, A. Gupta, D. Jayaraman, Y. J. Ma, and L. Weihs. Universal Visual Decomposer: Long-horizon manipulation made easy. In *ICRA*, 2024.
- [22] Y. Zhu, P. Stone, and Y. Zhu. Bottom-up skill discovery from unsegmented demonstrations for long-horizon robot manipulation. *IEEE Robotics and Automation Letters*, 7(2):4126–4133, 2022. 2
- [23] A. Curtis, X. Fang, L. P. Kaelbling, T. Lozano-Pérez, and C. R. Garrett. Long-horizon manipulation of unknown objects via task and motion planning with estimated affordances. In *ICRA*, 2022. 2
- [24] D. Driess, O. Oguz, J.-S. Ha, and M. Toussaint. Deep visual heuristics: Learning feasibility of mixed-integer programs for manipulation planning. In *ICRA*, 2020. 2
- [25] Y. Zhu, J. Tremblay, S. Birchfield, and Y. Zhu. Hierarchical planning for long-horizon manipulation with geometric and symbolic scene graphs. In *ICRA*, 2020. 2
- [26] D.-A. Huang, S. Nair, D. Xu, Y. Zhu, A. Garg, L. Fei-Fei, S. Savarese, and J. C. Niebles. Neural task graphs: Generalizing to unseen tasks from a single video demonstration. In *CVPR*, 2019.
- [27] D.-A. Huang, D. Xu, Y. Zhu, A. Garg, S. Savarese, F.-F. Li, and J. C. Niebles. Continuous relaxation of symbolic planner for one-shot imitation learning. In *IROS*, 2019. 2
- [28] W. Huang, P. Abbeel, D. Pathak, and I. Mordatch. Language models as zero-shot planners: Extracting actionable knowledge for embodied agents. In *ICML*, 2022. 2
- [29] T. Silver, V. Hariprasad, R. S. Shuttlesworth, N. Kumar, T. Lozano-Pérez, and L. P. Kaelbling. Pddl planning with pretrained large language models. In *NeurIPS 2022 foundation models for decision making workshop*, 2022. 2
- [30] K. Valmeekam, M. Marquez, S. Sreedharan, and S. Kambhampati. On the planning abilities of large language models-a critical investigation. In *NeurIPS*, 2023. 2
- [31] S. Kambhampati, K. Valmeekam, L. Guan, K. Stechly, M. Verma, S. Bhambri, L. Saldyt, and A. Murthy. Llm’s can’t plan, but can help planning in llm-modulo frameworks. *arXiv:2402.01817*, 2024. 2
- [32] Y. Chen, J. Arkin, Y. Zhang, N. Roy, and C. Fan. AutoTAMP: Autoregressive task and motion planning with llms as translators and checkers. In *ICRA*, 2024. 2
- [33] B. Liu, Y. Jiang, X. Zhang, Q. Liu, S. Zhang, J. Biswas, and P. Stone. LLM+P: Empowering large language models with optimal planning proficiency. *arXiv:2304.11477*, 2023.
- [34] Y. Xie, C. Yu, T. Zhu, J. Bai, Z. Gong, and H. Soh. Translating natural language to planning goals with large-language models. *arXiv:2302.05128*, 2023.
- [35] A. Mavrogiannis, C. Mavrogiannis, and Y. Aloimonos. Cook2ltl: Translating cooking recipes to ltl formulae using large language models. In *ICRA*, 2024. 2
- [36] T. Silver, S. Dan, K. Srinivas, J. B. Tenenbaum, L. Kaelbling, and M. Katz. Generalized planning in PDDL domains with pretrained large language models. In *AAAI*, 2024. 2
- [37] X. Zhu, Y. Chen, H. Tian, C. Tao, W. Su, C. Yang, G. Huang, B. Li, L. Lu, X. Wang, et al. Ghost in the Minecraft: Generally capable agents for open-world environments via large language models with text-based knowledge and memory. *arXiv:2305.17144*, 2023. 2



- [38] K. Nottingham, P. Ammanabrolu, A. Suhr, Y. Choi, H. Hajishirzi, S. Singh, and R. Fox. Do embodied agents dream of pixelated sheep: Embodied decision making using language guided world modelling. In *ICML*, 2023. 2
- [39] S. Hao, Y. Gu, H. Ma, J. J. Hong, Z. Wang, D. Z. Wang, and Z. Hu. Reasoning with language model is planning with world model. In *EMNLP*, 2023. 2
- [40] K. Lin, C. Agia, T. Migimatsu, M. Pavone, and J. Bohg. Text2motion: From natural language instructions to feasible plans. *Autonomous Robots*, 47(8):1345–1365, 2023. 2, 6
- [41] M. Skreta, Z. Zhou, J. L. Yuan, K. Darvish, A. Aspuru-Guzik, and A. Garg. Replan: Robotic replanning with perception and language models. *arXiv:2401.04157*, 2024. 2
- [42] D. Driess, F. Xia, M. S. Sajjadi, C. Lynch, A. Chowdhery, B. Ichter, A. Wahid, J. Tompson, Q. Vuong, T. Yu, et al. Palm-e: An embodied multimodal language model. *arXiv:2303.03378*, 2023. 2
- [43] Z. Wu, Z. Wang, X. Xu, J. Lu, and H. Yan. Embodied task planning with large language models. *arXiv:2307.01848*, 2023.
- [44] J. Xiang, T. Tao, Y. Gu, T. Shu, Z. Wang, Z. Yang, and Z. Hu. Language models meet world models: Embodied experiences enhance language models. In *NeurIPS*, 2024. 2
- [45] Y. Hu, F. Lin, T. Zhang, L. Yi, and Y. Gao. Look before you leap: Unveiling the power of GPT-4v in robotic vision-language planning. *arXiv:2311.17842*, 2023. 2, 6
- [46] N. Wake, A. Kanehira, K. Sasabuchi, J. Takamatsu, and K. Ikeuchi. ChatGPT empowered long-step robot control in various environments: A case application. *IEEE Access*, 2023. 2
- [47] L. Wong, J. Mao, P. Sharma, Z. S. Siegel, J. Feng, N. Korneev, J. B. Tenenbaum, and J. Andreas. Learning adaptive planning representations with natural language guidance. In *ICLR*, 2024. 2
- [48] L. Guan, K. Valmeekam, S. Sreedharan, and S. Kambhampati. Leveraging pre-trained large language models to construct and utilize world models for model-based task planning. In *NeurIPS*, 2023.
- [49] P. Smirnov, F. Joubin, A. Ceravola, and M. Gienger. Generating consistent PDDL domains with large language models. *arXiv:2404.07751*, 2024. 2
- [50] V. Lifschitz. On the semantics of STRIPS. In M. Georgeff, Lansky, and Amy, editors, *Reasoning about Actions and Plans*, pages 1–9. Morgan Kaufmann, San Mateo, CA, 1987. 3
- [51] C. Aeronautiques, A. Howe, C. Knoblock, I. D. McDermott, A. Ram, M. Veloso, D. Weld, D. W. SRI, A. Barrett, and D. Christianson. PDDL: The Planning Domain Definition Language, 1998. 4
- [52] T. Migimatsu and J. Bohg. Grounding predicates through actions. In *ICRA*, 2022. 5, 7
- [53] J. Mao, T. Lozano-Pérez, J. Tenenbaum, and L. Kaelbling. PDSketch: Integrated domain programming, learning, and planning. In *NeurIPS*, 2022. 5
- [54] S. Liu, Z. Zeng, T. Ren, F. Li, H. Zhang, J. Yang, C. Li, J. Yang, H. Su, J. Zhu, et al. Grounding dino: Marrying dino with grounded pre-training for open-set object detection. *arXiv:2303.05499*, 2023. 5, 16
- [55] O. Mees, L. Hermann, E. Rosete-Beas, and W. Burgard. Calvin: A benchmark for language-conditioned policy learning for long-horizon robot manipulation tasks. *RA-L*, 7:7327–7334, 2021. 5
- [56] O. Mees, L. Hermann, and W. Burgard. What matters in language conditioned robotic imitation learning over unstructured data. *RA-L*, 7:11205–11212, 2022. 6, 19

- 418 [57] Z. Zhang, Y. Li, O. Bastani, A. Gupta, D. Jayaraman, Y. J. Ma, and L. Weihs. Universal visual  
419 decomposer: Long-horizon manipulation made easy. In *ICRA*, 2024. 15
- 420 [58] W. Wan, Y. Zhu, R. Shah, and Y. Zhu. Lotus: Continual imitation learning for robot manipulation  
421 through unsupervised skill discovery. In *ICRA*, 2024. 15
- 422 [59] M.-H. Guo, J.-X. Cai, Z.-N. Liu, T.-J. Mu, R. R. Martin, and S.-M. Hu. Pct: Point cloud  
423 transformer. *Computational Visual Media*, 7:187–199, 2021. 16
- 424 [60] L. P. Kaelbling and T. Lozano-Pérez. Hierarchical task and motion planning in the now. In  
425 *ICRA*, 2011. 17, 18
- 426 [61] C. R. Garrett, C. Paxton, T. Lozano-Pérez, L. P. Kaelbling, and D. Fox. Online replanning in  
427 belief space for partially observable task and motion problems. In *ICRA*. IEEE, 2020. 18
- 428 [62] O. Mees, J. Borja-Diaz, and W. Burgard. Grounding language with visual affordances over  
429 unstructured data. In *ICRA*, 2023. 19

## Supplementary Material for Learning Compositional Behaviors from Demonstration and Language

This supplementary material provides additional details on the BLADE model, the simulation experiments, and qualitative examples. Section A provides a detailed description of the BLADE model, including the behavior description generation, predicate generation, abstract verification, automatic predicate annotation, classifier implementation, and policy implementation. Section B provides details on the simulation experiments, including the task design and baseline implementations. Section C provides qualitative examples of our method and baselines. Section D provides details of our setup of the real-robot experiment. Finally, Section E includes a full list of the prompts for the baselines used in the simulation experiments.

### A BLADE Details

#### A.1 Behavior Description Generation with LLMs

In Listing 2, we show the behavior descriptions automatically generated by the LLM for the CALVIN domain. We also show the detailed prompt to the LLM for generating the behavior description. We break down the system prompt into four parts: definitions of primitive actions (Listings 3), definitions of predicates and environment context (Listings 4), an in-context example (Listings 5), and additional instructions (Listings 6). In Listings 7, we show one example of the specific user prompt that is used to generate the behavior description for *place-in-drawer*.

#### A.2 Predicate Generation with LLMs

In our main experiment, we assume that the predicates for each task domain are provided in natural language. Here, we show that given the task definition and the environment context, a LLM can automatically generate the relevant predicates for the domain. Listing 8 shows the prompt for generating predicates; Listing 1 shows the generated predicates and the relevant actions for them. In Table A1, we compare the generated predicates with the predicates defined by the domain expert. We observe that the LLM is able to generate 13 out of 15 predicates that match closely with the expert-designed predicates. These predicates provide abstract representations for object states (e.g., *is-open*, *light-on*), relations between objects (e.g., *in-slider*, *in*), and robot-centric states (e.g., *holding*). The LLM incorrectly generates the predicate *next-to*( $?x, ?y$ ) to characterize the effects of the *push-left* and *push-right* actions, possibly due to ambiguities in the definition of the actions. Future work can explore interactive generation and refinement of predicates. Our algorithms are agnostic to the source of predicates and can flexibly generate action descriptions based on the given predicates and learn their groundings.

Listing 1: LLM Response for Predicate Generation.

```

### Unary Predicates
1. **(on-table ?x)** - Indicates that object ?x is on the table.
   - Relevant Actions: lift_red_block_table, lift_blue_block_table, lift_pink_block_table,
   place_on_table
2. **(in-slider ?x)** - Indicates that object ?x is inside the slider.
   - Relevant Actions: lift_red_block_slider, lift_blue_block_slider, lift_pink_block_slider,
   place_in_slider
3. **(in-drawer ?x)** - Indicates that object ?x is inside the drawer.
   - Relevant Actions: lift_red_block_drawer, lift_blue_block_drawer, lift_pink_block_drawer,
   place_in_drawer
4. **(is-open ?x)** - Indicates that container ?x (drawer or slider) is open.
   - Relevant Actions: open_drawer, close_drawer, place_in_drawer
5. **(is-closed ?x)** - Indicates that container ?x (drawer or slider) is closed.
   - Relevant Actions: close_drawer
6. **(light-on ?x)** - Indicates that the light (lightbulb or led) is turned on.
   - Relevant Actions: turn_off_lightbulb, turn_off_led
7. **(light-off ?x)** - Indicates that the light (lightbulb or led) is turned off.
   - Relevant Actions: turn_on_lightbulb, turn_on_led
8. **(holding ?x)** - Indicates that the robot is currently holding object ?x.
   - Relevant Actions: grasp, place, move, stack_block, unstack_block
9. **(clear ?x)** - Indicates that there is no object on top of ?x.

```

```

484 - Relevant Actions: stack_block, unstack_block, place_on_table
485 10. **(rotated-right ?x)** - Indicates that block ?x is rotated to the right.
486 - Relevant Actions: rotate_red_block_left, rotate_blue_block_left, rotate_pink_block_left
487 11. **(rotated-left ?x)** - Indicates that block ?x is rotated to the left.
488 - Relevant Actions: rotate_red_block_right, rotate_blue_block_right,
489 rotate_pink_block_right
490 12. **(slider-left ?x)** - Indicates that the slider ?x is in the leftmost position.
491 13. **(slider-right ?x)** - Indicates that the slider ?x is in the rightmost position.
492
493 ### Binary Relations
494 1. **(on ?x ?y)** - Indicates that object ?x is on top of object ?y.
495 - Relevant Actions: stack_block, unstack_block
496 2. **(next-to ?x ?y)** - Indicates that object ?x is next to object ?y.
497 - Relevant Actions: push_red_block_right, push_red_block_left, push_blue_block_right,
498 push_blue_block_left, push_pink_block_right, push_pink_block_left

```

### 500 A.3 Temporal Segmentation

501 Before the generation of behavior description, we segment each demonstration into a sequence of  
502 *contact-based primitives*. We consider seven primitives describing the interactions between the robot  
503 and other objects: *open/close* grippers without holding objects, *move-to(x)* which moves the gripper  
504 to an object, *grasp(x, y)* and *place(x, y)* which grasp and place object *x* from/onto another object *y*,  
505 *move(x)* which moves the currently holding object *x* and *push(x)*.

506 We use a set of heuristics to automatically segment the continuous trajectories using proprioception,  
507 i.e., gripper open state, and object segmentation. Specifically, *open* and *close* are directly detected by  
508 checking whether the gripper width is at the maximum or minimum value. *grasp(x, y)* and *place(x, y)*  
509 correspond to the other closing and opening gripper actions. *move(x)*, *push(x)* and *move-to(x)* are  
510 matched to temporal segments between pairs of gripper actions. Their type can be inferred based on  
511 the preceding and following gripper actions. We make a simplifying assumption that the robot moves  
512 freely in space only when the gripper is fully open and pushes objects only when the gripper is fully  
513 closed. These are given as instructions to the human demonstrators. In the simulator, the arguments  
514 of the primitives are obtained from the contact state. In the real world, they are inferred from the  
515 language annotations of the actions (e.g., “place the kettle on the stove” corresponds to *place(kettle,*  
516 *stove)*) procedurally or by the LLMs.

517 In Section 4.1, we discuss that we use LLMs to predict a *body* of contact primitive sequence associated  
518 with each behavior description. This additional step helps account for noises in the segmentation anno-  
519 tations, which are prevalent in CALVIN’s language-annotated demonstrations. For example, the lan-  
520 guage annotation “lift-block-table” correspond to the contact sequence  $\{move-to, grasp, move, place\}$ .  
521 Based on the generated *body*, the behavior can be correctly mapped to  $\{grasp, move\}$  and the demon-

**Table A1: Comparison of Predicates Defined by Domain Expert and Predicates Generated by an LLM.**

| Manually Defined           | Automatically Generated             |
|----------------------------|-------------------------------------|
| <i>rotated-left(?x)</i>    | <i>rotated-left(?x)</i>             |
| <i>rotated-right(?x)</i>   | <i>rotated-right(?x)</i>            |
| <i>lifted(?x)</i>          | <i>holding(?x)</i>                  |
| <i>is-open(?x)</i>         | <i>is-open(?x)</i>                  |
| <i>is-close(?x)</i>        | <i>is-closed(?x)</i>                |
| <i>is-turned-on(?x)</i>    | <i>light-on(?x)</i>                 |
| <i>is-turned-off(?x)</i>   | <i>light-off(?x)</i>                |
| <i>is-slider-left(?x)</i>  | <i>slider-left(?x)</i>              |
| <i>is-slider-right(?x)</i> | <i>slider-right(?x)</i>             |
| <i>is-on(?x, ?y)</i>       | <i>on-table(?x)</i>                 |
| <i>is-in(?x, ?y)</i>       | <i>in-slider(?x), in-drawer(?x)</i> |
| <i>stacked(?x, ?y)</i>     | <i>on(?x, ?y)</i>                   |
| <i>unstacked(?x, ?y)</i>   | <i>clear(?x)</i>                    |
| <i>pushed-left(?x)</i>     | -                                   |
| <i>pushed-right(?x)</i>    | -                                   |
| -                          | <i>next-to(?x, ?y)</i>              |



522 stration trajectories can then be re-segmented. This additional step is crucial for learning accurate  
 523 groundings of the states and actions.

524 In our preliminary studies, we also experiment with other vision-based temporal segmentation  
 525 methods including UVD [57] and Lotus [58]. A main issue for incorporating these methods is that  
 526 they provide less consistent segmentations for different occurrences of the same behavior. As we  
 527 discussed in Section 6, more advanced contact detection techniques will be an important future  
 528 direction for using contact primitives as a meaningful interface between actions and language.

#### 529 A.4 Abstract Verification

530 After the generation of the behavior descriptions, we verify the generated behavior descriptions by  
 531 performing abstract verification on the demonstration trajectories. Given a segmented sequence of  
 532 the trajectory where each segment is associated with a behavior, we verify whether the preconditions  
 533 of each behavior can be satisfied by the accumulated effects of the previous behaviors. Pseudocode  
 534 for this algorithm is shown in Algorithm 1.

---

#### Algorithm 1 Abstract Verification

---

**Input:** Dataset  $\mathcal{D}$ , Behavior descriptions  $\mathcal{A}$

```

1: error_counter  $\leftarrow$  a counter for sequencing errors related to each behavior
2: counter  $\leftarrow$  a counter for storing the occurrences of each behavior
3: for  $i \leftarrow 1$  to  $K$  do
4:   obtain a behavior sequence  $\mathcal{D}_i \leftarrow \{a_1^i, \dots, a_N^i\}$ 
5:   initialize a dictionary for predicate state  $pred \leftarrow \{\}$ 
6:   for  $t \leftarrow 1$  to  $N$  do
7:     for each  $exp$  in  $pre_{a_t^i}$  do
8:        $(p, v) \leftarrow \text{EXTRACTPREDICATEANDBOOL}(exp)$ 
9:       if  $p$  not in  $pred$  then
10:         $pred[p] \leftarrow v$ 
11:       else
12:        if  $pred[p] \neq v$  then
13:         increment  $error\_counter[a_t^i]$ 
14:       for each  $exp$  in  $eff_{a_t^i}$  do
15:         $(p, v) \leftarrow \text{EXTRACTPREDICATEANDBOOL}(exp)$ 
16:         $pred[p] \leftarrow v$ 
17:       increment  $counter[a_t^i]$ 
18: for each  $a$  in  $error\_counter$  do
19:   if  $error\_counter[a]/counter[a] > threshold$  then
20:     regenerate the behavior description for  $a$ 

```

---

#### 535 A.5 Automatic Predicate Annotation

536 We leverage *all* behavior descriptions to automatically label an observation  $\bar{o} = \{o_1, \dots, o_H\}$  based  
 537 on its associated segmentation. In particular, at  $o_0$ , we label all state predicates as “unknown.” Next,  
 538 we unroll the sequence of behavior executed in  $\bar{o}$ . As illustrated in Fig. 3c, before applying a behavior  
 539  $a$  at step  $o_t$ , we label all predicates in  $pre_a$  true. When  $a$  finishes at step  $o_{t'}$ , we label all predicates in  
 540  $eff_a$ . In addition, we will propagate the labels for state predicates to later time steps until they are  
 541 explicitly altered by another behavior  $a$ . Pseudocode for this algorithm is shown in Algorithm 2.

#### 542 A.6 Classifier Implementation

543 Based on the state predicate dataset generated from behavior definitions, we train a set of state  
 544 classifiers  $f_\theta(p) : \mathcal{O} \rightarrow \{T, F\}$ , which are implemented as standard neural networks for classification.

545 In the simulation experiment, the classifier model is based on a pre-trained CLIP model (ViT-B/32).  
 546 We use the image pre-processing pipeline from the CLIP model to process the input images. We

---

**Algorithm 2** Predicate Annotation

---

**Input:** Behavior sequence  $\{a_1, \dots, a_N\}$ , Observation sequence  $\{o_1, \dots, o_H\}$ , Descriptions  $\mathcal{A}$

- 1:  $propagated \leftarrow$  an empty list of propagated predicates
- 2:  $prev\_effs \leftarrow$  a list for storing effects from previous step
- 3:  $timed\_preds \leftarrow$  an empty list of predicates associated with time steps
- 4:  $pred\_obs \leftarrow$  an empty list for storing predicates paired with observations
- 5: **for**  $t \leftarrow 1$  to  $N$  **do**
- 6:    *// Precondition*
- 7:     $timed\_preds \leftarrow timed\_preds \cup \text{GETTIMEDPREDICATES}(pre_{a_t}, t)$
- 8:     $timed\_preds \leftarrow timed\_preds \cup \text{GETTIMEDPREDICATES}(\neg eff_{a_t}, t)$
- 9:    *// Propagated*
- 10:    **for each**  $p$  in  $propagated$  **do**
- 11:      **if not**  $\text{ALTERED}(p, a_t)$  **then**
- 12:         $\text{UPDATE TIME}(p, t)$
- 13:      **else**
- 14:         $propagated.remove(p)$
- 15:         $timed\_preds.add(p)$
- 16:    *// Previous effects*
- 17:    **for each**  $p$  in  $prev\_effs$  **do**
- 18:      **if not**  $\text{ALTERED}(p, a_t)$  **then**
- 19:         $propagated.add(p)$
- 20:      **else**
- 21:         $timed\_preds.add(p)$
- 22:    *// Store effects for next step*
- 23:     $prev\_effs \leftarrow \text{GETTIMEDPREDICATES}(eff_{a_t}, t)$
- 24:  $timed\_preds.update(propagated)$
- 25:  $timed\_preds.update(prev\_effs)$
- 26: **for each**  $p$  in  $timed\_preds$  **do**
- 27:     $pred\_obs.update(\text{MATCHTIMEDPREDICATEWITHOBSERVATION}(p, \{o_1, \dots, o_H\}))$
- 28: **return**  $pred\_obs$

---

547 use images from the static camera in the simulation. We perform one additional step of image  
548 processing to mask out the robot arm, which we find in our preliminary experiment to help avoid  
549 overfitting. We do not use the global image embedding from the CLIP model, instead we extract the  
550 patch tokens from the output of the vision transformer. We downsize the concatenated patch tokens  
551 with a multilayer perceptron (MLP) and then concatenate with word embeddings of the predicate  
552 arguments (e.g., *red-block*, *table*). The final embedding is then passed through a predicate-specific  
553 MLP to output the logit for binary classification. The CLIP model is frozen, while all other learnable  
554 parameters are trained.

555 In the real-world experiment, we find that, with more limited data than simulation, the pre-trained  
556 CLIP model often overfits to spurious relations in the training images (e.g., the state of the faucet  
557 is entangled with the location of the kettle). We also experiment with a ResNet-50 model pre-  
558 trained on ImageNet and find similar behavior. To improve generalization, we choose to focus on  
559 relevant objects and regions. We achieve this by using segmented object point clouds. We use open  
560 vocabulary object detector Grounding-Dino [54] to detect objects given object names. The predicted  
561 2D bounding boxes are projected into 3D and used to extract regions of the point cloud surrounding  
562 each object. The point-cloud-based classifier is based on the shape classification model from the  
563 Point Cloud Transformer (PCT) [59]. We concatenate the segmented object point clouds and include  
564 one additional channel to indicate the identity of each point. The PCT is used to encode the combined  
565 point cloud and output the final logit. The PCT model is trained from scratch.

## A.7 Policy Implementation

For each behavior, we train control policies  $\pi_\theta(a) : \mathcal{O} \rightarrow \mathcal{U}$ , implemented as a diffusion policy [1]. We make three changes to the original implementation to facilitate chaining the learned behaviors. First, when training the model to predict the first raw action for each skill, we replace the history observations with observations sampled randomly from a temporal window prior to when the skill is executed, to avoid bias in the starting positions of the robot arm. Second, we perform biased sampling of the training sequences to ensure that the policy is trained on a diverse set of starting positions. Third, at the end of each training sequence, we append a sequence of zeros actions so the learned policy can learn to predicate termination. These strategies are implemented for both the simulation and the real world.

In simulation, we construct the point cloud of the scene using the RGB-D image from the frame-mounted camera. We then obtain segmented object point clouds for the relevant objects of each behavior (e.g., *table* and *block* for *pick-block-table*) with groundtruth segmentation masks from the PyBullet simulator. The segmented point clouds of the objects are concatenated to form the input point cloud observation. The model uses the PCT to encode a sequence of point clouds as history observations and uses another time-series transformer encoder to reason over the history observations and predict the next actions. The time-series transformer is similar in design to the transformer-based diffusion policy [1].

In the real world, we use RGB images from four stationary cameras mounted around the workspace and a wrist-mounted camera as input to an image-based diffusion policy model. The input is processed using five separate ResNet-34 encoder heads. The policy directly predicts the gripper pose in the world frame. We found the wrist-mounted camera to be particularly helpful in the real-world setup.

## A.8 Planner Implementation

**Planning over geometric constraints.** Geometric constraints, specifically the collision-free constraints for each action, are handled “in the now,” right before an action is executed. This is because in order to classify the geometric constraints, we would need to know the exact pose of all objects in the environments. However, we do not explicitly learn models for predicting the exact location of objects after executing certain behaviors.

Our approach to handle this is to process them in the now. It follows the hierarchical planning strategy [60]. In particular, the precondition for actions is an ordered list. In our case, there are two levels: the second level contains the geometric constraint preconditions and the first level contains the rest of the semantic preconditions. During planning, only the first set of preconditions will be added to the subgoal list. After we have finished planning for the first-level preconditions, we consider the second-level precondition for the first behavior in the resulting plan, by possibly moving other obstacles away.

As an example, let us consider the skill of opening the cabinet door. Its first-level precondition only considers the initial state of the cabinet door (i.e., it should be initially closed). It also has a second-level precondition stating that nothing else should be blocking the door. In the beginning, the planner only considers the first-level preconditions. When this behavior is selected to be executed next, the planner checks for the second-level precondition. If this non-blocking precondition is not satisfied in the current state, we will recursively call the planner to achieve it (which will generate actions that move the blocking obstacles away). If this precondition has already been satisfied, we will proceed to execute the policy associated with this *opening-cabinet-door* skill.

This strategy will work for scenarios where there is enough space for moving obstacles around and the robot does not need to make dedicated plans for arranging objects. In scenarios where space is tight and dedicated object placement planning is required, we can extend our framework to include the prediction of object poses after each skill execution.

**Planning over partial observability.** Partial observability is handled assuming the most likely state. In particular, the effect definitions for all behaviors are deterministic. It denotes the most likely

615 state that it will result in. For example, in the definition of behaviors for finding objects (e.g., the  
616 *find-object-in-left-cabinet*), we have a deterministic and “optimistic” effect statement that the object  
617 will be visible after executing this action.

618 At performance time, since we will replan after executing each behavior, if the object is not visible  
619 after we have opened the left cabinet, the planner will automatically plan for other actions to achieve  
620 this visibility subgoal.

621 This strategy works for simple partially observable Markov decision processes (POMDPs). A  
622 potential extension to it is to model a belief state (e.g., representing a distribution of possible object  
623 poses) and execute belief updates on it. Planners can then use more advanced algorithms such as  
624 observation-based planning to generate plans. Such strategies have been studied in task and motion  
625 planning literature [60, 61].

## 626 B Simulation Experiment Details

### 627 B.1 Task Design

628 To evaluate generalization to new long-horizon manipulation tasks, we designed six tasks that fall  
629 into three categories: Abstract Goal, Geometric Constraint, and Partial Observability. Each task has a  
630 language instruction, a sampler that generates random initial states, and a goal satisfaction function  
631 for evaluation. We provide details for each task below.

#### 632 Task-1

- 633 • **Task Category:** Abstract Goal
- 634 • **Language Instruction:** *turn off all lights.*
- 635 • **Logical Goal:** (and (is-turned-off led) (is-turned-off lightbulb))
- 636 • **Initial State:** Both the led and the lightbulb are initially turned on.
- 637 • **Goal Satisfaction:** The logical states of both the lightbulb and the led are off.
- 638 • **Variation:** The initial states of the led and the lightbulb are both on and the goal is to turn them  
639 off.

#### 640 Task-2

- 641 • **Task Category:** Abstract Goal
- 642 • **Language Instruction:** *move all blocks to the closed drawer.*
- 643 • **Logical Goal:** (and (is-in red-block drawer) (is-in blue-block drawer) (is-in pink-block drawer))
- 644 • **Initial State:** The blocks are visible and not in the drawer. The drawer is closed.
- 645 • **Goal Satisfaction:** The blocks are in the drawer.

#### 646 Task-3

- 647 • **Task Category:** Abstract Goal
- 648 • **Language Instruction:** *move all blocks to the open drawer.*
- 649 • **Logical Goal:** (and (is-in red-block drawer) (is-in blue-block drawer) (is-in pink-block drawer))
- 650 • **Initial State:** The blocks are visible and not in the drawer. The drawer is open.
- 651 • **Goal Satisfaction:** The blocks are in the drawer.

#### 652 Task-4

- 653 • **Task Category:** Partial Observability
- 654 • **Language Instruction:** *place a red block on the table.*
- 655 • **Logical Goal:** (is-on red-block table)
- 656 • **Initial State:** The red block is in the drawer and the drawer is closed.
- 657 • **Goal Satisfaction:** The red block is placed on the table.
- 658 • **Variations:** Find the blue block or the pink block.

#### 659 Task-5

- 660 • **Task Category:** Partial Observability
- 661 • **Language Instruction:** *place a red block on the table.*



- **Logical Goal:** (is-on red-block table)
- **Initial State:** The red block is behind the sliding door.
- **Goal Satisfaction:** The red block is placed on the table.
- **Variations:** Find the blue block or the pink block.

#### Task-6

- **Task Category:** Geometric Constraint
- **Language Instruction:** *open the slider.*
- **Logical Goal:** (is-slider-left slider)
- **Initial State:** The sliding door is on the right and there is a pink block on the path of the sliding door to the left.
- **Goal Satisfaction:** The sliding door is within 5cm of the left end.
- **Variations:** Move the slider to the right.

## B.2 Baseline Implementation

**HULC.** This baseline is a hierarchical policy learning method that learns from language-annotated play data using hindsight labeling [56]. It’s one of the best-performing models on the  $D \rightarrow D$  split of the CALVIN benchmark. We omit the comparison to the HULC++ method [62], the follow-up work of HULC that leverages affordance prediction and motion planning to improve the low-level skills, because our evaluation is focused on the task planning ability of the learned hierarchical model.

**SayCan.** This baseline combines an LLM-based planner that takes the language instruction and learned feasibility functions for skills to perform task planning. We adopt SayCan to our learning-from-play-data setting by training our own skill feasibility function by predicting possible next actions to be executed at each state. The prompt of the model is listed in Listing 9.

**Robot-VILA.** This baseline performs task planning with a VLM. We adopt the prompts provided in the original paper to the CALVIN environment. The prompts are divided into the initial prompt that is used to generate the task plan given the initial observation (shown in Listing 10) and the follow-up prompt that is used for all subsequent steps (shown in Listing 11). We use gpt-4-turbo-2024-04-09 as the VLM. Because the model does not memorize the history. We store the history dialogue, including the text input and the image input, and concatenate the history dialogue with the current dialogue as the input to the VLM.

**T2M-Shooting.** This baseline (in particular, the shooting-based algorithm) is similar to the SayCan algorithm except that: 1) it uses a multi-step feasibility model in contrast to the single-step feasibility model used by SayCan; 2) the LLM additionally takes a symbolic state description of object states and relationships. The original Text2Motion method assumes access to ground-truth symbolic states. For comparison, in this paper, we compare Text2Motion with BLADE in two settings: one with the ground-truth states and the other with the state classifiers learned by BLADE. The prompt of the model is listed in Listing 12.

## C Qualitative Examples

In this section, we include three qualitative examples from the CALVIN experiments to compare the generalization capabilities of BLADE with baselines. Specifically, Fig. A2 shows generalization to abstract goal, Fig. A3 shows generalization to partial observability, and Fig. A4 shows generalization to geometric constraint. In summary, BLADE is able to generate accurate long-horizon manipulation plans for novel situations while latent planning, LLM, and VLM baselines fail.

## D Real World Experiment Details

As shown in Fig. A1, we employ a 7-degree of freedom (DOF) Franka Emika robotic arm equipped with a parallel jaw gripper. A total of Five Intel RealSense RGB-D cameras are used to provide

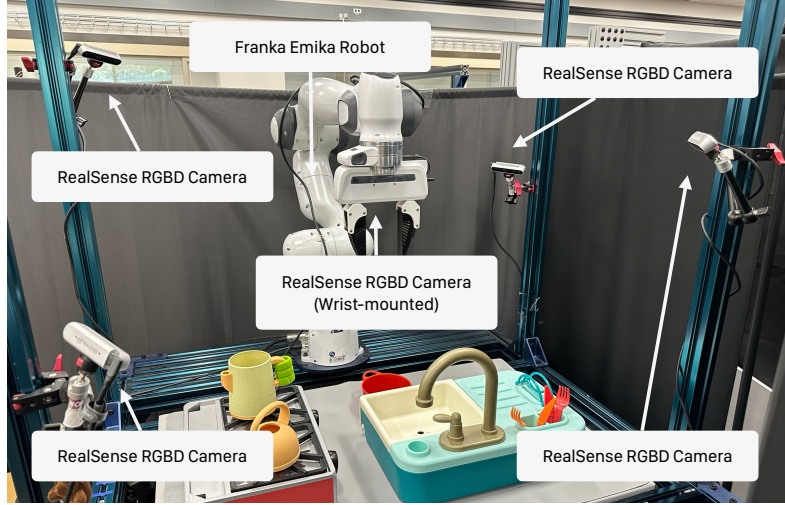

**Figure A1:** We use a 7-degree of freedom (DOF) Franka Emika robotic arm with a parallel jaw gripper for our real-world experiment. A total of Five Intel RealSense RGB-D cameras are used to provide observation for our policies and state classifiers. Four cameras are mounted on the frame and an additional one is mounted to the robot’s wrist.

observation for our policies and state classifiers. Four cameras are mounted on the frame and one additional camera is mounted on the robot’s wrist.

We use a teleoperation system with a 3DConnexion SpaceMouse for control. During the collection of demonstrations, we record the robot’s joint configurations, the pose of the end effector, the gripper width, and the RGB-D images from the five cameras. We collected approximately 80 demonstrations for each of the two real-world domains, which provide the training data for the diffusion policy models and the state classifiers.

Similar to our simulation experiments, our evaluation protocol includes the design of six tasks aimed at assessing the model’s generalization capabilities across new long-horizon tasks. These tasks are specifically crafted to test the model’s proficiency for four types of generalization: Unseen Initial Condition, State Perturbation, Partial Observability, and Geometric Constraint.

#### Task-1

- **Domain:** Boil Water
- **Task Category:** Unseen Initial Condition
- **Language Instruction:** *Fill the kettle with water and place it on the stove*
- **Logical Goal:** (and (is-filled kettle) (is-placed-on kettle stove) (is-turned-off faucet-knob))
- **Initial State:** The kettle is placed inside the sink, and the stove is not blocked. The faucet is turned off with the faucet head turned away.

#### Task-2

- **Domain:** Boil Water
- **Task Category:** State Perturbation
- **Language Instruction:** *Fill the kettle with water and place it on the stove*
- **Logical Goal:** (and (is-filled kettle) (is-placed-on kettle stove) (is-turned-off faucet-knob))
- **Initial State:** The kettle is placed inside the sink and the stove is blocked.
- **Perturbation:** The human user moves the kettle from the sink to the table after the robot turns the faucet head towards the sink. The robot needs to replan to move the kettle back to the sink.

#### Task-3

- **Domain:** Boil Water
- **Task Category:** Geometric Constraint
- **Language Instruction:** *Fill the kettle with water and place it on the stove*

- 737 • **Logical Goal:** (and (is-filled kettle) (is-placed-on kettle stove) (is-turned-off faucet-knob))
- 738 • **Initial State:** The kettle is placed inside the sink and the stove is blocked, creating a geometric
- 739 constraint.

#### 740 Task-4

- 741 • **Domain:** Make Tea
- 742 • **Task Category:** Unseen Initial Condition
- 743 • **Language Instruction:** *Place the kettle on the stove and place the teabag inside the kettle.*
- 744 • **Logical Goal:** (and (is-placed-on kettle stove) (is-placed-inside teabag kettle))
- 745 • **Initial State:** The kettle is placed inside a cabinet. The cabinet doors are open. The drawer is
- 746 closed.

#### 747 Task-5

- 748 • **Domain:** Make Tea
- 749 • **Task Category:** State Perturbation
- 750 • **Language Instruction:** *Place the kettle on the stove and place the teabag inside the kettle.*
- 751 • **Logical Goal:** (and (is-placed-on kettle stove) (is-placed-inside teabag kettle))
- 752 • **Initial State:** The kettle is placed inside the cabinet and the cabinet door is open. The drawer is
- 753 initially closed.
- 754 • **Perturbation:** Once the robot opens the drawer, a human user closes the drawer.

#### 755 Task-6

- 756 • **Domain:** Make Tea
- 757 • **Task Category:** Geometric Constraint
- 758 • **Language Instruction:** *Place the kettle on the stove and place the teabag inside the kettle.*
- 759 • **Logical Goal:** (and (is-placed-on kettle stove) (is-placed-inside teabag kettle))
- 760 • **Initial State:** There is a teapot blocking the cabinet doors. The kettle is inside the cabinet. The
- 761 drawer is open with the teabag visible.

#### 762 Task-7

- 763 • **Domain:** Make Tea
- 764 • **Task Category:** Partial Observability
- 765 • **Language Instruction:** *Place the kettle on the stove and place the teabag inside the kettle.*
- 766 • **Logical Goal:** (and (is-placed-on kettle stove) (is-placed-inside teabag kettle))
- 767 • **Initial State:** The kettle is placed inside a cabinet and is not visible.

## 768 E Prompts for Baselines

769 In this section, we provide the prompts for the baselines used in the simulation experiments. We  
 770 provide the prompts for SayCan in Listing 9, Robot-VILA in Listing 10 and Listing 11, and T2M-  
 771 Shooting in Listing 12.

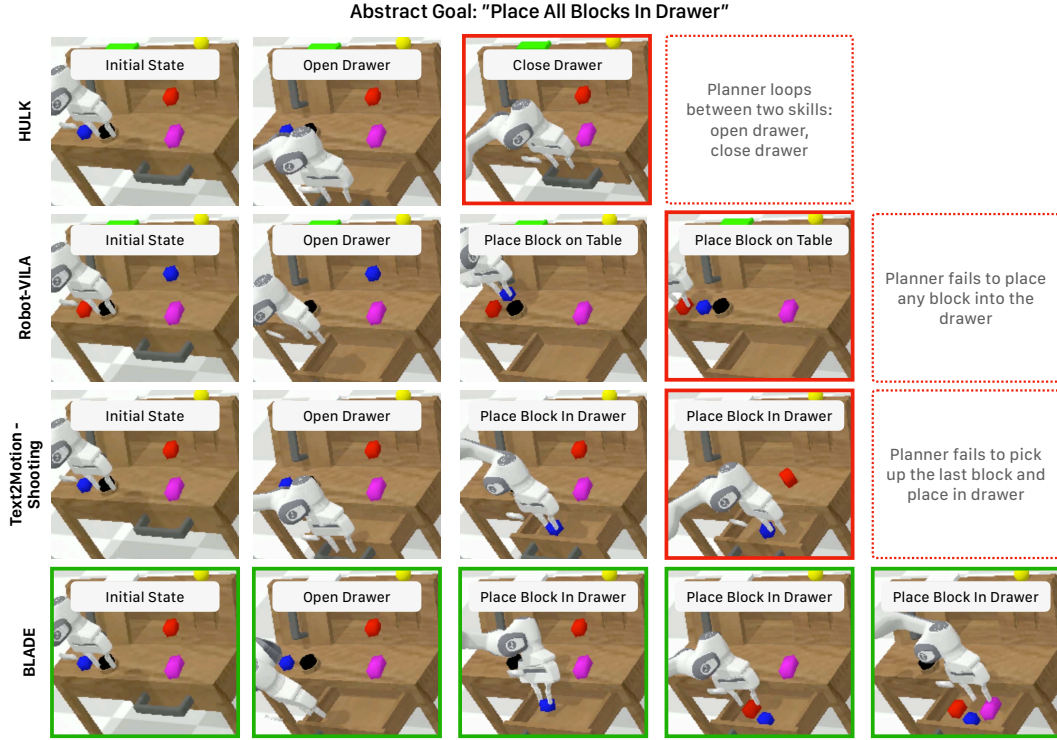

**Figure A2:** BLADE and baseline performance on an Abstract Goal generalization task in the CALVIN environment.

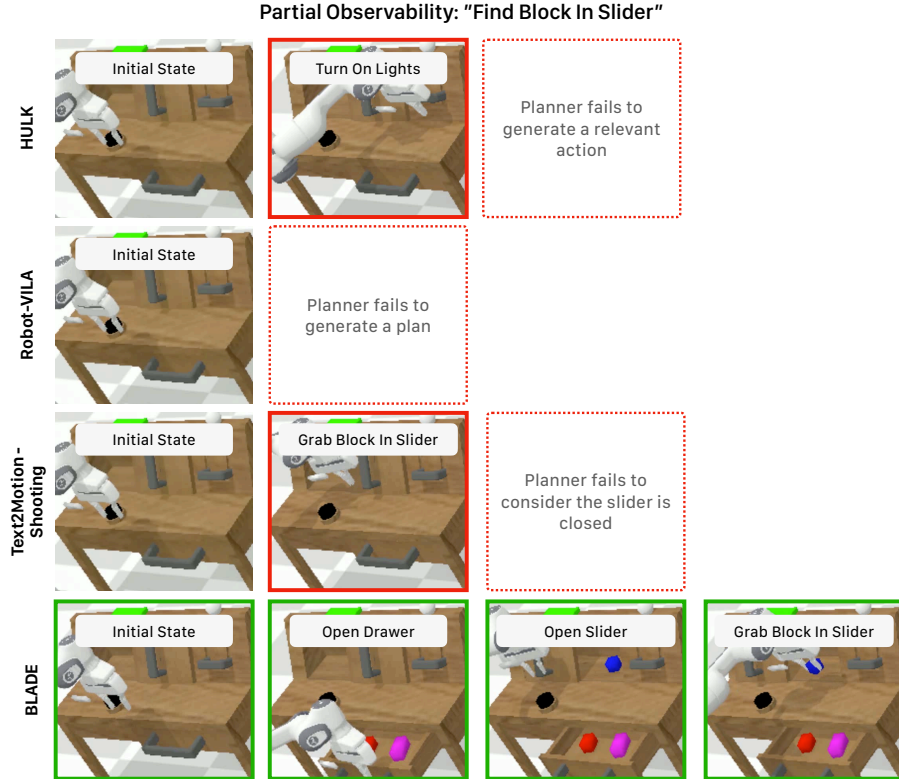

**Figure A3:** BLADE and baseline performance on the Partial Observability generalization task in the CALVIN environment.

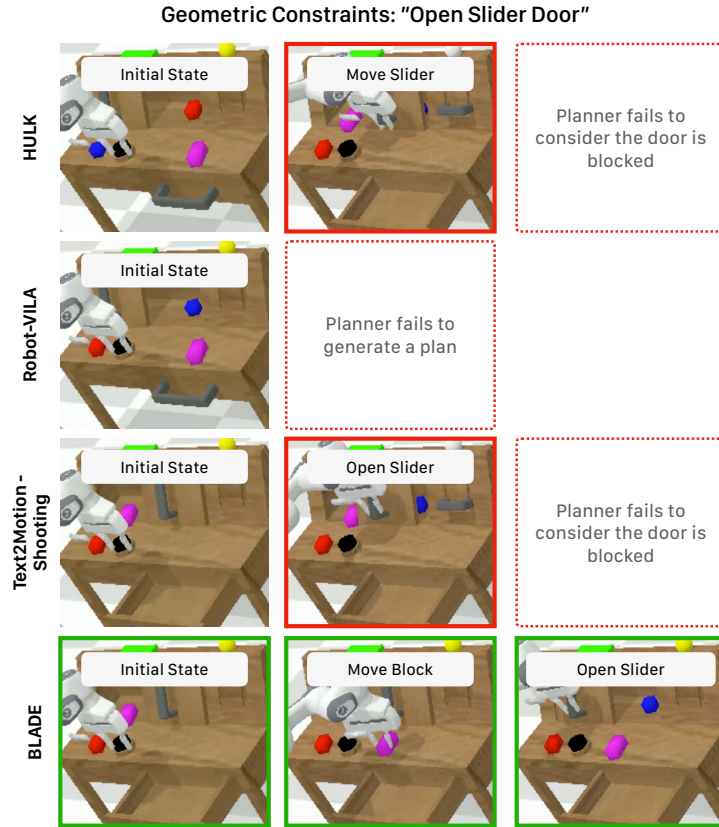

**Figure A4:** BLADE and baseline performance on the Geometric Constraint generalization task in the CALVIN environment.

**Listing 2: Behavior descriptions generated by the LLM for the CALVIN domain.**

```
772 ;; lift_block_table
773 (:action lift-block-table
774 :parameters (?block - item ?table - item)
775 :precondition (and (is-block ?block) (is-table ?table) (is-on ?block ?table) (not (is-lifted
776 ?block)))
777 :effect (and (lifted ?block) (not (is-on ?block ?table)))
778 :body (then
779 (grasp ?block ?table)
780 (move ?block)
781 )
782 )
783 )
784
785 ;; lift_block_slider
786 (:action lift_block_slider
787 :parameters (?block - item ?slider - item)
788 :precondition (and (is-block ?block) (is-slider ?slider) (is-in ?block ?slider))
789 :effect (and (lifted ?block) (not (is-in ?block ?slider)))
790 :body (then
791 (grasp ?block ?slider)
792 (move ?block)
793 )
794 )
795
796 ;; lift_block_drawer
797 (:action lift-block-drawer
798 :parameters (?block - item ?drawer - item)
799 :precondition (and (is-block ?block) (is-drawer ?drawer) (is-in ?block ?drawer) (is-open ?
800 drawer))
801 :effect (and (lifted ?block) (not (is-in ?block ?drawer)))
802 :body (then
803 (grasp ?block ?drawer)
804 (move ?block)
805 )
806 )
807
808 ;; place_in_slider
809 (:action place-in-slider
810 :parameters (?block - item ?slider - item)
811 :precondition (and (is-block ?block) (is-slider ?slider) (is-lifted ?block))
812 :effect (and (is-in ?block ?slider) (not (is-lifted ?block)))
813 :body (then
814 (place ?block ?slider)
815 )
816 )
817
818 ;; place_in_drawer
819 (:action place-in-drawer
820 :parameters (?block - item ?drawer - item)
821 :precondition (and (is-block ?block) (is-drawer ?drawer) (is-lifted ?block) (is-open ?drawer)
822 )
823 :effect (and (is-in ?block ?drawer) (not (is-lifted ?block)))
824 :body (then
825 (place ?block ?drawer)
826 )
827 )
828
829 ;; place_on_table
830 (:action place-on-table
831 :parameters (?block - item ?table - item)
832 :precondition (and (is-block ?block) (is-table ?table) (is-lifted ?block))
833 :effect (and (is-on ?block ?table) (not (is-lifted ?block)))
834 :body (then
835 (place ?block ?table)
836 )
837 )
838
839 ;; stack_block
840 (:action stack_block
841 :parameters (?block - item ?target - item)
842 :precondition (and (is-block ?block) (is-block ?target) (is-lifted ?block))
843 :effect (and (stacked ?block ?target) (not (is-lifted ?block)))
844 :body (then
845 (place ?block ?target)
846 )
847 )
848
849
850 ;; unstack_block
851 (:action unstack_block
```



```

852 :parameters (?block1 - item ?block2 - item)
853 :precondition (and (is-block ?block1) (is-block ?block2) (stacked ?block1 ?block2))
854 :effect (and (unstacked ?block1 ?block2) (is-lifted ?block1) (not (stacked ?block1 ?block2)))
855 :body (then
856   (grasp ?block1 ?block2)
857   (move ?block1)
858 )
859 )
860
861 ;; rotate_block_right
862 (:action rotate-block-right
863 :parameters (?block - item ?table - item)
864 :precondition (and (is-block ?block) (is-table ?table) (is-on ?block ?table))
865 :effect (and
866   (rotated-right ?block)
867   (not (rotated-left ?block)))
868 :body (then
869   (grasp ?block ?table)
870   (move ?block)
871   (place ?block ?table)
872 )
873 )
874
875 ;; rotate_block_left
876 (:action rotate-block-left
877 :parameters (?block - item ?table - item)
878 :precondition (and (is-block ?block) (is-table ?table) (is-on ?block ?table))
879 :effect (and (rotated-left ?block))
880 :body (then
881   (grasp ?block)
882   (move ?block)
883   (place ?block)
884 )
885 )
886
887 ;; push_block_right
888 (:action push-block-right
889 :parameters (?block - item ?table - item)
890 :precondition (and (is-block ?block) (is-table ?table) (is-on ?block ?table))
891 :effect (and (pushed-right ?block) (not (pushed-left ?block)))
892 :body (then
893   (close)
894   (push ?block)
895   (open)
896 )
897 )
898
899 ;; push_block_left
900 (:action push-block-left
901 :parameters (?block - item)
902 :precondition (and (is-block ?block))
903 :effect (and (pushed-left ?block))
904 :body (then
905   (close)
906   (push ?block)
907   (open)
908 )
909 )
910
911 ;; move_slider_left
912 (:action move-slider-left
913 :parameters (?slider - item)
914 :precondition (and (is-slider ?slider) (is-slider-right ?slider))
915 :effect (and (is-slider-left ?slider) (not (is-slider-right ?slider)))
916 :body (then
917   (grasp ?slider)
918   (move ?slider)
919   (place ?slider)
920 )
921 )
922
923 ;; move_slider_right
924 (:action move-slider-right
925 :parameters (?slider - item)
926 :precondition (and (is-slider ?slider) (not (is-slider-right ?slider)))
927 :effect (and (is-slider-right ?slider))
928 :body (then
929   (grasp ?slider)
930   (move ?slider)
931   (place ?slider)
932 )

```

```

933 )
934
935 ;; open_drawer
936 (:action open-drawer
937   :parameters (?drawer - item)
938   :precondition (and (is-drawer ?drawer) (is-close ?drawer))
939   :effect (and (is-open ?drawer) (not (is-close ?drawer)))
940   :body (then
941     (close)
942     (push ?drawer)
943     (open)
944   )
945 )
946
947 ;; close_drawer
948 (:action close-drawer
949   :parameters (?drawer - item)
950   :precondition (and (is-drawer ?drawer) (is-open ?drawer))
951   :effect (and (is-close ?drawer) (not (is-open ?drawer)))
952   :body (then
953     (close)
954     (push ?drawer)
955     (open)
956   )
957 )
958
959 ;; turn_on_lightbulb
960 (:action turn-on-lightbulb
961   :parameters (?lightbulb - item)
962   :precondition (and (is-lightbulb ?lightbulb) (is-turned-off ?lightbulb))
963   :effect (and (is-turned-on ?lightbulb) (not (is-turned-off ?lightbulb)))
964   :body (then
965     (close)
966     (push ?lightbulb)
967     (open)
968   )
969 )
970
971 ;; turn_off_lightbulb
972 (:action turn-off-lightbulb
973   :parameters (?lightbulb - item)
974   :precondition (and (is-lightbulb ?lightbulb) (is-turned-on ?lightbulb))
975   :effect (and (is-turned-off ?lightbulb) (not (is-turned-on ?lightbulb)))
976   :body (then
977     (close) (push ?lightbulb) (open)
978   )
979 )
980
981 ;; turn_on_led
982 (:action turn-on-led
983   :parameters (?led - item)
984   :precondition (is-led ?led)
985   :effect (and (is-turned-on ?led) (not (is-turned-off ?led)))
986   :body (then
987     (close)
988     (push ?led)
989     (open)
990   )
991 )
992
993 ;; turn_off_led
994 (:action turn-off-led
995   :parameters (?led - item)
996   :precondition (and (is-led ?led) (is-turned-on ?led))
997   :effect (and (is-turned-off ?led) (not (is-turned-on ?led)))
998   :body (then
999     (close)
1000     (push ?led)
1001     (open)
1002   )
1003 )
1004
1005 ;; push_into_drawer
1006 (:action push-into-drawer
1007   :parameters (?block - item ?drawer - item)
1008   :precondition (and (is-block ?block) (is-drawer ?drawer) (is-open ?drawer))
1009   :effect (and (is-in ?block ?drawer))
1010   :body (then
1011     (close)
1012     (push ?block)
1013     (open)

```

```
1014 )
1015 )
```

---

### Listing 3: Example Prompt for CALVIN-Contact Primitives.

---

```
1017 **Primitive Actions:**
1018 There are seven primitive actions that the robot can perform. They are:
1019 - (grasp ?x ?y): ?x and ?y are two object variables. ?x is the object that the robot will be
1020 grasping, ?y is the object that ?x is currently on or in.
1021 - (place ?x ?y): ?x and ?y are two object variables. ?x is the object that the robot is
1022 currently holding, ?y is the object that ?x will be placed on or in.
1023 - (move ?x): ?x is the object that the robot is currently holding and will be moved by the
1024 robot.
1025 - (push ?x): ?x is the object that the robot will be pushing.
1026 - (move-to ?x): the robot arm will move without holding any object or pushing any object.
1027 - (open): the robot gripper will open fully.
1028 - (close): the robot gripper will close without grasping any object.
1029
1030 **Combined Primitives:**
1031 The primitive actions can be combined into a high-level routine. For example, (then (grasp ?x
1032 ?y) (move ?x) (place ?x ?y)) means the robot will pick up ?x from ?y, move ?x, and place ?x to
1033 ?z. The possible combination of primitives are:
1034 A. (then (grasp ?x ?y) (move ?x))
1035 B. (then (place ?x ?y))
1036 C. (then (grasp ?x ?y) (move ?x) (place ?x ?z))
1037 D. (then (close) (push ?x) (open))
1038
```

---

---

### Listing 4: Example Prompt for CALVIN-Environment.

---

```
1040 **Predicates for Preconditions and Effects:**
1041 The list of all possible predicates for defining the preconditions and effects of the high-
1042 level routine are listed below:
1043
1044 For specifying the type of the object:
1045 - (is-table ?x - item): ?x is a table.
1046 - (is-slider ?x - item): ?x is a slider.
1047 - (is-drawer ?x - item): ?x is a drawer.
1048 - (is-lightbulb ?x - item): ?x is a lightbulb.
1049 - (is-led ?x - item): ?x is a led.
1050 - (is-block ?x - item): ?x is a block.
1051
1052 For specifying the attributes of the object:
1053 - (is-red ?x - item): ?x is red. This predicate applies to a block.
1054 - (is-blue ?x - item): ?x is blue. This predicate applies to a block.
1055 - (is-pink ?x - item): ?x is pink. This predicate applies to a block.
1056
1057 For specifying the state of the object:
1058 - (rotated-left ?x - item): ?x is rotated left. This predicate applies to a block.
1059 - (rotated-right ?x - item): ?x is rotated right. This predicate applies to a block.
1060 - (pushed-left ?x - item): ?x is pushed left. This predicate applies to a block.
1061 - (pushed-right ?x - item): ?x is pushed right. This predicate applies to a block.
1062 - (lifted ?x - item): ?x is lifted in the air. This predicate applies to a block.
1063 - (is-open ?x - item): ?x is open. This predicate applies to a drawer.
1064 - (is-close ?x - item): ?x is close. This predicate applies to a drawer.
1065 - (is-turned-on ?x - item): ?x is turned on. This predicate applies to a lightbulb or a led.
1066 - (is-turned-off ?x - item): ?x is turned off. This predicate applies to a lightbulb or a led.
1067 - (is-slider-left ?x - item): the sliding door of the slider ?x is on the left.
1068 - (is-slider-right ?x - item): the sliding door of the slider ?x is on the right.
1069
1070 For specifying the relationship between objects:
1071 - (is-on ?x - item ?y - item): ?x is on top of ?y. This predicate applies when ?x is a block
1072 and ?y is a table.
1073 - (is-in ?x - item ?y - item): ?x is inside of ?y. This predicate applies when ?x is a block
1074 and ?y is a drawer or a slider.
1075 - (stacked ?x - item ?y - item): ?x is stacked on top of ?y. This predicate applies when ?x
1076 and ?y are blocks.
1077 - (unstacked ?x - item ?y - item): ?x is unstacked from ?y. This predicate applies when ?x and
1078 ?y are blocks.
1079
1080 **Task Environment:**
1081 In the environment where the demonstrations are being performed, there are the following
1082 objects:
1083 - A table. Objects can be placed on the table.
1084 - A drawer that can be opened. Objects can be placed into the drawer when it is open.
1085 - A slider which is a cabinet with a sliding door. The sliding door can be moved to the left
1086 or to the right. Objects can be placed into the slider no matter the position of the sliding
1087 door.
1088 - A lightbulb that be can turned on/off with a button.
1089 - A led that can be turned on/off with a button.
1090
```

1092 - Three blocks that can be rotated, pushed, lifted, and placed.

---

#### Listing 5: Example Prompt for CALVIN-In-Context Example.

```
1093
1094 **Demonstration Parsing:**
1095 Now, you will help to parse several human demonstrations of the robot performing a task and
1096 generate a lifted description of how to accomplish this task.
1097 For each demonstration, a sequence of performed primitives will be given, with actual object
1098 names. Three demonstrations for the task of "place_in_slider" is:
1099
1100 <code name="primitive_sequence">
1101 primitives = [
1102   {"name": "grasp", "arguments": ["red_block", "table"]}
1103   {"name": "move", "arguments": ["red_block"]}
1104   {"name": "place", "arguments": ["red_block", "slider"]}
1105   {"name": "move-to", "arguments": [""]}
1106 ]
1107 </code>
1108
1109 <code name="primitive_sequence">
1110 primitives = [
1111   {"name": "grasp", "arguments": ["blue_block", "table"]}
1112   {"name": "move", "arguments": ["blue_block"]}
1113   {"name": "place", "arguments": ["blue_block", "slider"]}
1114   {"name": "move-to", "arguments": [""]}
1115 ]
1116 </code>
1117
1118 <code name="primitive_sequence">
1119 primitives = [
1120   {"name": "grasp", "arguments": ["pink_block", "table"]}
1121   {"name": "move", "arguments": ["pink_block"]}
1122   {"name": "place", "arguments": ["pink_block", "slider"]}
1123   {"name": "move-to", "arguments": [""]}
1124 ]
1125 </code>
1126
1127 **Previous Tasks:**
1128 A list of tasks that can be performed before the current task will also be provided as context
1129 . For the task of "place_in_slider", the possible previous tasks are:
1130 lift_block_table, lift_block_drawer, move_slider_right
1131
1132 **Example Output:**
1133 You should generate a lifted description, treating all objects as variables. For example, the
1134 lifted description for "place_in_slider" is:
1135 <code name="mechanism">
1136 (:mechanism place-in-slider
1137  :parameters (?block - item ?slider - item)
1138  :precondition (and (is-block ?block) (is-slider ?slider) (is-lifted ?block))
1139  :effect (and (is-in ?block ?slider) (not (is-lifted ?block)))
1140  :body (then
1141    (place ?block ?slider)
1142  )
1143 )
1144 </code>
```

---

#### Listing 6: Example Prompt for CALVIN-Instructions.

```
1146
1147 **Think Step-by-Step:**
1148 To generate the lifted description, you should think through the task in natural language in
1149 the following steps. Be EXTREMELY CAREFUL to think through step 3a, 3b, and 4a, 4b.
1150 1. Parse the goal. For example "place_in_slider", the goal is to place a block into the slider
1151 .
1152 2. Think about the possible effects achieved by previous tasks and the previous actions that
1153 have been performed. For "lift_block_table", a block is lifted from the table and the effect
1154 is that the block is lifted. For "lift_block_drawer", a block is lifted from the drawer and
1155 the effect is that the block is lifted. For "move_slider_right", the sliding door of the
1156 slider is moved to the right and the effect is that the sliding door is on the right.
1157 3. Parse the demonstrations and choose the combination of primitives for the current task. The
1158 demonstrations are noisy so that the demonstrated primitive sequences may include extra
1159 primitive actions that are not necessary for the current task at the beginning or end. The
1160 extra primitive actions can be for the previous tasks. Combining with the understanding of the
1161 task and previous task to infer the correct combination of primitives for the current task.
1162 3a. In this case, the previous tasks are relevant to the current task. We should think about
1163 how to sequence the previous tasks with the current task. The primitive combination for the
1164 current task should not include primitive actions that have been performed. The above example
1165 for "place_in_slider" is this case. We can infer that "grasp" in the demonstrated sequences is
1166 likely to be for the previous tasks and should not be included in the primitive combination
```

```

1167 for the current task. We therefore choose B. (then (place ?x ?y)). The semantics is that the
1168 robot place the lifted block in the slider.
1169 3b. In this case, the previous tasks are not relevant to the current task.
1170 4. Think about the preconditions. Also specify the types of all relevant objects in the
1171 preconditions.
1172 4a. In this case, previous tasks are relevant to the current task. We should think about the
1173 effects of the previous tasks. For "place_in_slider", the effects of previous tasks include
1174 the block is already lifted. So we should specify that the block is lifted in the
1175 preconditions for the current task.
1176 4b. In this case, previous tasks are not relevant to the current task.
1177 5. Think about the effects. For "place_in_slider", the effects are that the block is in the
1178 slider and the block is not lifted.
1179 6. Write down the mechanism in the format of the example.
1180
1181 **Additional Instructions:**
1182 1. Make sure the generated lifted description starts with <code name="mechanism"> and ends
1183 with </code>.
1184 2. Please do not invent any new predicates for the precondition and effect. You can only use
1185 the predicates listed above.
1186 3. Consider the physical constraints of the objects. For example, a robot arm can not go
1187 through a closed door.
1188 4. For each parameter in :parameters, you should use one of the predicates for specifying the
1189 type of the object to indicate its type (e.g., is-drawer, is-block, and etc).

```

---

### Listing 7: Example Prompt for CALVIN-Task Input.

```

1191
1192 **Current Task:** place_in_drawer
1193
1194 **Example Sequences:**
1195 <code name="primitive_sequence">
1196 primitives = [
1197   {"name": "grasp", "arguments": ["blue_block", "table"]}
1198   {"name": "move", "arguments": ["blue_block"]}
1199   {"name": "place", "arguments": ["blue_block", "drawer"]}
1200   {"name": "move-to", "arguments": [""]}
1201 ]
1202 </code>
1203
1204 <code name="primitive_sequence">
1205 primitives = [
1206   {"name": "grasp", "arguments": ["red_block", "table"]}
1207   {"name": "move", "arguments": ["red_block"]}
1208   {"name": "place", "arguments": ["red_block", "drawer"]}
1209   {"name": "move-to", "arguments": [""]}
1210 ]
1211 </code>
1212
1213 <code name="primitive_sequence">
1214 primitives = [
1215   {"name": "grasp", "arguments": ["pink_block", "table"]}
1216   {"name": "move", "arguments": ["pink_block"]}
1217   {"name": "place", "arguments": ["pink_block", "drawer"]}
1218   {"name": "move-to", "arguments": [""]}
1219 ]
1220 </code>
1221
1222 **Previous Tasks:** push_into_drawer, lift_block_table, lift_block_slider

```

---

### Listing 8: Example Prompt for Predicate Generation.

```

1224
1225 You are a helpful agent in helping a robot interpret human demonstrations and discover a
1226 generalized high-level routine to accomplish a given task.
1227 **Primitive Actions:**
1228 There are seven primitive actions that the robot can perform. They are:
1229 - (grasp ?x ?y): ?x and ?y are two object variables. ?x is the object that the robot will be
1230 grasping, ?y is the object that ?x is currently on or in.
1231 - (place ?x ?y): ?x and ?y are two object variables. ?x is the object that the robot is
1232 currently holding, ?y is the object that ?x will be placed on or in.
1233 - (move ?x): ?x is the object that the robot is currently holding and will be moved by the
1234 robot.
1235 - (push ?x): ?x is the object that the robot will be pushing.
1236 - (move-to ?x): the robot arm will move without holding any object or pushing any object.
1237 - (open): the robot gripper will open fully.
1238 - (close): the robot gripper will close without grasping any object.
1239
1240 **Task Environment:**
1241 In the environment where the demonstrations are being performed, there are the following
1242 objects:
1243 - A table. Objects can be placed on the table.

```

```

1244 - A drawer that can be opened. Objects can be placed into the drawer when it is open.
1245 - A slider which is a cabinet with a sliding door. The sliding door can be moved to the left
1246 or to the right. Objects can be placed into the slider no matter the position of the sliding
1247 door.
1248 - A lightbulb that be can turned on/off with a button.
1249 - A led that can be turned on/off with a button.
1250 - Three blocks that can be rotated, pushed, lifted, and placed.
1251
1252 **Task**
1253 You will help the robot to write PDDL definitions for the following actions:
1254 1. lift_red_block_table
1255 2. lift_red_block_slider
1256 3. lift_red_block_drawer
1257 4. lift_blue_block_table
1258 5. lift_blue_block_slider
1259 6. lift_blue_block_drawer
1260 7. lift_pink_block_table
1261 8. lift_pink_block_slider
1262 9. lift_pink_block_drawer
1263 10. stack_block
1264 11. unstack_block
1265 12. place_in_slider
1266 13. place_in_drawer
1267 14. place_on_table
1268 15. rotate_red_block_right
1269 16. rotate_red_block_left
1270 17. rotate_blue_block_right
1271 18. rotate_blue_block_left
1272 19. rotate_pink_block_right
1273 20. rotate_pink_block_left
1274 21. push_red_block_right
1275 22. push_red_block_left
1276 23. push_blue_block_right
1277 24. push_blue_block_left
1278 25. push_pink_block_right
1279 26. push_pink_block_left
1280 27. move_slider_left
1281 28. move_slider_right
1282 29. open_drawer
1283 30. close_drawer
1284 31. turn_on_lightbulb
1285 32. turn_off_lightbulb
1286 33. turn_on_led
1287 34. turn_off_led
1288
1289 Before writing the operators, define the predicates that should be used to write the
1290 preconditions and effects of the operators. Group the predicates into unary predicates that
1291 define the states of objects and binary relations that specify relations between two objects.
1292 For each predicate, list actions that are relevant.

```

---

### Listing 9: Prompt for SayCan.

```

1294 **Objective:**
1295 You are a helpful agent in helping a robot plan a sequence of actions to accomplish a given
1296 task.
1297 I will first provide context and then provide an example of how to perform the task.
1298
1299 **Task Environment:**
1300 In the robot's environment, there are the following objects:
1301 - A table. Objects can be placed on the table.
1302 - A drawer that can be opened. Objects can be placed into the drawer when it is open.
1303 - A slider which is a cabinet with a sliding door. The sliding door can be moved to the left
1304 or to the right. Objects can be placed into the slider no matter the position of the sliding
1305 door.
1306 - A lightbulb that be can turned on/off with a button.
1307 - A led that can be turned on/off with a button.
1308 - Three blocks that can be rotated, pushed, lifted, and placed.
1309
1310 **Actions:**
1311 There are the following actions that the robot can perform. They are:
1312 - lift_red_block_table: lift the red block from the table.
1313 - lift_red_block_slider: lift the red block from the slider.
1314 - lift_red_block_drawer: lift the red block from the drawer.
1315 - lift_blue_block_table: lift the blue block from the table.
1316 - lift_blue_block_slider: lift the blue block from the slider.
1317 - lift_blue_block_drawer: lift the blue block from the drawer.
1318 - lift_pink_block_table: lift the pink block from the table.
1319 - lift_pink_block_slider: lift the pink block from the slider.
1320 - lift_pink_block_drawer: lift the pink block from the drawer.
1321 - stack_block: stack the blocks.
1322

```



```

1323 - place_in_slider: place the block in the slider.
1324 - place_in_drawer: place the block in the drawer.
1325 - place_on_table: place the block on the table.
1326 - rotate_red_block_right: rotate the red block to the right.
1327 - rotate_red_block_left: rotate the red block to the left.
1328 - rotate_blue_block_right: rotate the blue block to the right.
1329 - rotate_blue_block_left: rotate the blue block to the left.
1330 - rotate_pink_block_right: rotate the pink block to the right.
1331 - rotate_pink_block_left: rotate the pink block to the left.
1332 - push_red_block_right: push the red block to the right.
1333 - push_red_block_left: push the red block to the left.
1334 - push_blue_block_right: push the blue block to the right.
1335 - push_blue_block_left: push the blue block to the left.
1336 - push_pink_block_right: push the pink block to the right.
1337 - push_pink_block_left: push the pink block to the left.
1338 - move_slider_left: move the slider to the left.
1339 - move_slider_right: move the slider to the right.
1340 - open_drawer: open the drawer.
1341 - close_drawer: close the drawer.
1342 - turn_on_lightbulb: turn on the lightbulb.
1343 - turn_off_lightbulb: turn off the lightbulb.
1344 - turn_on_led: turn on the led.
1345 - turn_off_led: turn off the led.
1346 - do_nothing: do nothing.
1347
1348 **Example Task:**
1349 Now, you will help to parse the goal predicate and generate a list of candidate actions the
1350 robot can potentially take to accomplish the task. You should rank the actions in terms of how
1351 likely they are to be performed next.
1352 Goal predicate: (is-turned-off led)
1353 Task output:
1354 ```python
1355 ['turn_off_led', 'do_nothing']
1356 ```
1357 In this example above, if the led is on, the robot should turn it off. If the led is already
1358 off, the robot should do nothing.
1359
1360 **Additional Instructions:**
1361 1. Make sure the generated plan is a list of actions. Place the list between ```python and
1362 ends with ```.
1363 2. Think Step-by-Step.
1364

```

---

#### Listing 10: Initial Prompt for Robot-VILA.

```

1365 You are highly skilled in robotic task planning, breaking down intricate and long-term tasks
1366 into distinct primitive actions.
1367 If the object is in sight, you need to directly manipulate it. If the object is not in sight,
1368 you need to use primitive skills to find the object
1369 first. If the target object is blocked by other objects, you need to remove all the blocking
1370 objects before picking up the target object. At
1371 the same time, you need to ignore distracters that are not related to the task. And remember
1372 your last step plan needs to be "done".
1373
1374 Consider the following skills a robotic arm can perform.
1375 - lift_red_block_table: lift the red block from the table.
1376 - lift_red_block_slider: lift the red block from the slider.
1377 - lift_red_block_drawer: lift the red block from the drawer.
1378 - lift_blue_block_table: lift the blue block from the table.
1379 - lift_blue_block_slider: lift the blue block from the slider.
1380 - lift_blue_block_drawer: lift the blue block from the drawer.
1381 - lift_pink_block_table: lift the pink block from the table.
1382 - lift_pink_block_slider: lift the pink block from the slider.
1383 - lift_pink_block_drawer: lift the pink block from the drawer.
1384 - stack_block: stack the blocks.
1385 - place_in_slider: place the block in the slider.
1386 - place_in_drawer: place the block in the drawer.
1387 - place_on_table: place the block on the table.
1388 - rotate_red_block_right: rotate the red block to the right.
1389 - rotate_red_block_left: rotate the red block to the left.
1390 - rotate_blue_block_right: rotate the blue block to the right.
1391 - rotate_blue_block_left: rotate the blue block to the left.
1392 - rotate_pink_block_right: rotate the pink block to the right.
1393 - rotate_pink_block_left: rotate the pink block to the left.
1394 - push_red_block_right: push the red block to the right.
1395 - push_red_block_left: push the red block to the left.
1396 - push_blue_block_right: push the blue block to the right.
1397 - push_blue_block_left: push the blue block to the left.
1398 - push_pink_block_right: push the pink block to the right.
1399 - push_pink_block_left: push the pink block to the left.
1400 - move_slider_left: move the slider to the left.
1401

```

```

1402 - move_slider_right: move the slider to the right.
1403 - open_drawer: open the drawer.
1404 - close_drawer: close the drawer.
1405 - turn_on_lightbulb: turn on the lightbulb.
1406 - turn_off_lightbulb: turn off the lightbulb.
1407 - turn_on_led: turn on the led.
1408 - turn_off_led: turn off the led.
1409 - done: the goal has reached.
1410
1411 You are only allowed to use the provided skills. You can first itemize the task-related
1412 objects to help you plan.
1413 For the actions you choose, list them as a list in the following format.
1414
1415 <code>
1416 ['turn_off_led', 'open_drawer', 'done']
1417 </code>

```

---

### Listing 11: Follow-Up Prompt for Robot-VILA.

---

```

1419 This image displays a scenario after you have executed some steps from the plan generated
1420 earlier. When interacting with people,
1421 sometimes the robotic arm needs to wait for the person's action. If you do not find the target
1422 object in the current image, you need to
1423 continue searching elsewhere. Continue to generate the plan given the updated environment
1424 state.
1425

```

---

### Listing 12: Prompt for Text2Motion.

---

```

1427
1428 **Objective:**
1429 You are a helpful agent in helping a robot plan a sequence of actions to accomplish a given
1430 task.
1431 I will first provide context and then provide an example of how to perform the task.
1432
1433 **Task Environment:**
1434 In the robot's environment, there are the following objects:
1435 - A table. Objects can be placed on the table.
1436 - A drawer that can be opened. Objects can be placed into the drawer when it is open.
1437 - A slider which is a cabinet with a sliding door. The sliding door can be moved to the left
1438 or to the right. Objects can be placed into the slider no matter the position of the
1439 sliding door.
1440 - A lightbulb that be can turned on/off with a button.
1441 - A led that can be turned on/off with a button.
1442 - Three blocks that can be rotated, pushed, lifted, and placed.
1443
1444 **Predicates for symbolic state:**
1445 The list of all possible predicates for defining the symbolic state are listed below:
1446 - (rotated-left ?x - item): ?x is rotated left. This predicate applies to a block.
1447 - (rotated-right ?x - item): ?x is rotated right. This predicate applies to a block.
1448 - (pushed-left ?x - item): ?x is pushed left. This predicate applies to a block.
1449 - (pushed-right ?x - item): ?x is pushed right. This predicate applies to a block.
1450 - (lifted ?x - item): ?x is lifted in the air. This predicate applies to a block.
1451 - (is-open ?x - item): ?x is open. This predicate applies to a drawer.
1452 - (is-close ?x - item): ?x is close. This predicate applies to a drawer.
1453 - (is-turned-on ?x - item): ?x is turned on. This predicate applies to a lightbulb or a led.
1454 - (is-turned-off ?x - item): ?x is turned off. This predicate applies to a lightbulb or a
1455 led.
1456 - (is-slider-left ?x - item): the sliding door of the slider ?x is on the left.
1457 - (is-slider-right ?x - item): the sliding door of the slider ?x is on the right.
1458 - (is-on ?x - item ?y - item): ?x is on top of ?y. This predicate applies when ?x is a block
1459 and ?y is a table.
1460 - (is-in ?x - item ?y - item): ?x is inside of ?y. This predicate applies when ?x is a block
1461 and ?y is a drawer or a slider.
1462 - (stacked ?x - item ?y - item): ?x is stacked on top of ?y. This predicate applies when ?x
1463 and ?y are blocks.
1464 - (unstacked ?x - item ?y - item): ?x is unstacked from ?y. This predicate applies when ?x
1465 and ?y are blocks.
1466
1467 **Actions:**
1468 There are the following actions that the robot can perform. They are:
1469 - lift_red_block_table: lift the red block from the table.
1470 - lift_red_block_slider: lift the red block from the slider.
1471 - lift_red_block_drawer: lift the red block from the drawer.
1472 - lift_blue_block_table: lift the blue block from the table.
1473 - lift_blue_block_slider: lift the blue block from the slider.
1474 - lift_blue_block_drawer: lift the blue block from the drawer.
1475 - lift_pink_block_table: lift the pink block from the table.
1476 - lift_pink_block_slider: lift the pink block from the slider.
1477 - lift_pink_block_drawer: lift the pink block from the drawer.
1478 - stack_block: stack the blocks.

```

```

1479 - place_in_slider: place the block in the slider.
1480 - place_in_drawer: place the block in the drawer.
1481 - place_on_table: place the block on the table.
1482 - rotate_red_block_right: rotate the red block to the right.
1483 - rotate_red_block_left: rotate the red block to the left.
1484 - rotate_blue_block_right: rotate the blue block to the right.
1485 - rotate_blue_block_left: rotate the blue block to the left.
1486 - rotate_pink_block_right: rotate the pink block to the right.
1487 - rotate_pink_block_left: rotate the pink block to the left.
1488 - push_red_block_right: push the red block to the right.
1489 - push_red_block_left: push the red block to the left.
1490 - push_blue_block_right: push the blue block to the right.
1491 - push_blue_block_left: push the blue block to the left.
1492 - push_pink_block_right: push the pink block to the right.
1493 - push_pink_block_left: push the pink block to the left.
1494 - move_slider_left: move the slider to the left.
1495 - move_slider_right: move the slider to the right.
1496 - open_drawer: open the drawer.
1497 - close_drawer: close the drawer.
1498 - turn_on_lightbulb: turn on the lightbulb.
1499 - turn_off_lightbulb: turn off the lightbulb.
1500 - turn_on_led: turn on the led.
1501 - turn_off_led: turn off the led.
1502
1503 **Example Task:**
1504 Now, you will help to parse the goal predicate and generate a sequence of actions to
1505 accomplish this task.
1506 Goal predicate: (is-turned-off led)
1507 Symbolic state: is-turned-on(led), is-turned-on(lightbulb), not(is-turned-off(led)), not(is-
1508 turned-off(lightbulb))
1509 Task output:
1510 ```python
1511 ['turn_off_led']
1512 ```
1513
1514 **Example Task:**
1515 Goal predicate: (is-turned-on led)
1516 Symbolic state: is-turned-on(led), is-turned-on(lightbulb), not(is-turned-off(led)), not(is-
1517 turned-off(lightbulb))
1518 Task output:
1519 ```python
1520 []
1521 ```
1522
1523 **Example Task:**
1524 Goal predicate: (is-in red_block drawer)
1525 Symbolic state: not(is-in(red_block, drawer)), not(is-in(red_block, slider)), is-on(
1526 red_block, table), not(is-open(drawer)), is-close(drawer), is-slider-left(slider), not(is-
1527 slider-right(slider)), not(lifted(red_block))
1528 Task output:
1529 ```python
1530 ['open_drawer', 'lift_red_block_table', 'place_in_drawer']
1531 ```
1532
1533 **Example Task:**
1534 Goal predicate: (is-in red_block drawer)
1535 Symbolic state: not(is-in(red_block, drawer)), not(is-in(red_block, slider)), not(is-on(
1536 red_block, table)), is-open(drawer), not(is-close(drawer)), is-slider-left(slider), not(is-
1537 slider-right(slider)), lifted(red_block)
1538 Task output:
1539 ```python
1540 ['place_in_drawer']
1541 ```
1542
1543 **Example Task:**
1544 Goal predicate: (and (is-turned-on lightbulb) (is-slider-right slider))
1545 Symbolic state: is-slider-left(slider), not(is-slider-right(slider)), is-turned-off(
1546 lightbulb), not(is-turned-on(lightbulb))
1547 Task output:
1548 ```python
1549 ['turn_on_lightbulb', 'move_slider_right']
1550 ```
1551
1552 **Additional Instructions:**
1553 1. Make sure the generated plan is a list of actions. Place the list between ```python and
1554 ends with ```.
1555 2. Think Step-by-Step.

```

---
